1 **Comprehensive Genetic Profiling of Sensorineural Hearing Loss Using an**  
2 **Integrative Diagnostic Approach**

3 Sang-Yeon Lee<sup>1,2,3,8</sup>, Seungbok Lee<sup>2,4,8</sup>, Seongyeol Park<sup>5,8</sup>, Sung Ho Jung<sup>1</sup>, Yejin  
4 Yun<sup>1</sup>, Won Hoon Choi<sup>1</sup>, Ju Hyuen Cha<sup>1</sup>, Hongseok Yun<sup>2</sup>, Sangmoon Lee<sup>5</sup>, Myung-  
5 Whan Suh<sup>1</sup>, Moo Kyun Park<sup>1</sup>, Jae-Jin Song<sup>6</sup>, Byung Yoon Choi<sup>6</sup>, Jun Ho Lee<sup>1</sup>, Young  
6 Seok Ju<sup>5,7</sup>, June-Young Koh<sup>5,\*</sup>, Jong-Hee Chae<sup>2,4,\*</sup>

7 <sup>1</sup> Department of Otorhinolaryngology, Seoul National University College of Medicine,  
8 Seoul National University Hospital, Seoul, South Korea

9 <sup>2</sup> Department of Genomic Medicine, Seoul National University Hospital, Seoul, South  
10 Korea

11 <sup>3</sup> Sensory Organ Research Institute, Seoul National University Medical Research  
12 Center

13 <sup>4</sup> Department of Pediatrics, Seoul National University College of Medicine, Seoul  
14 National University Children's Hospital, Seoul, South Korea

15 <sup>5</sup> Inocras Inc., San Diego, California, United States

16 <sup>6</sup> Department of Otorhinolaryngology, Seoul National University College of Medicine,  
17 Seoul National University Bundang Hospital, Seongnam, South Korea

18 <sup>7</sup> Graduate School of Medical Science and Engineering, Korea Advanced Institute of  
19 Science and Technology, Daejeon, South Korea

20 <sup>8</sup> These authors contributed equally to this work.

21

22 **\* Corresponding author**

23 **June-Young Koh**

24 Inocras, Inc., 6330 Nancy Ridge Drive Suite 106, San Diego, CA 92121, United

25 States

26 Tel : +1-858-665-2120

27 E-mail: [jy.koh@inocras.com](mailto:jy.koh@inocras.com)

28

29 **Jong-Hee Chae**

30 Division of Pediatric Neurology, Department of Pediatrics,

31 Pediatric Clinical Neuroscience Center, Seoul National University Children's Hospital,

32 Seoul National University College of Medicine

33 101 Daehakro Jongno-gu, Seoul, South Korea 03080

34 Tel : +82-2-2072-3622; Fax : +82-2-7433455

35 E-mail: [chaeped1@snu.ac.kr](mailto:chaeped1@snu.ac.kr)

36

37 **Total number of words**

38 Abstract (188), Main Text (3,756)

39 **Abstract**

40 Despite the advent of Next-Generation Sequencing (NGS), genetic diagnosis of  
41 genetic disorders remains challenging, with diagnostic rates plateauing at  
42 approximately 50%. We investigated sensorineural hearing loss (SNHL), a prevalent  
43 sensory disorder with substantial genetic heterogeneity, through a comprehensive  
44 genomic analysis of a homogeneous disease cohort. Leveraging 394 families (750  
45 individuals), we implemented a systematic multi-tiered genomic approach  
46 encompassing single-gene analysis to whole-genome sequencing (WGS), integrated  
47 with functional assays and bioinformatic analysis. Our methodological framework  
48 revealed a cumulative diagnostic yield of 55.6% (219 families), with automated WGS  
49 bioinformatics pipeline uncovering an additional 20 families harboring pathogenic  
50 variants, predominantly structural variants. Notably, comparative genomic analysis  
51 unveiled a higher frequency of single pathogenic alleles in recessive genes within  
52 our SNHL cohort relative to control populations. Subsequent deep intronic region  
53 interrogation identified three pathogenic variants on the opposite allele,  
54 substantiating the diagnostic utility of comprehensive genomic profiling. Through this  
55 approach, we delineated a genome-phenome landscape of SNHL, elucidating  
56 molecular signatures and establishing genotype-phenotype correlations at the inner  
57 ear functional level. This study underscores the transformative potential of WGS as a  
58 robust molecular diagnostic modality, advancing precision medicine paradigms in  
59 genetic disease research.

60 **Keywords:** Sensorineural hearing loss; Whole-genome sequencing; Stepwise  
61 genomic approach; Genotype-phenotype correlations

## 62 **Introduction**

63           Hearing is the primary sense used for human communication and an  
64 important component in the development of language and music. Thus, hearing  
65 impairment, the most common sensory deficit in humans, is a major public health  
66 problem, affecting approximately 466 million people worldwide (World Health  
67 Organization, [https://who.int/news-room/fact-sheets/detail/deafness-and-hearing-](https://who.int/news-room/fact-sheets/detail/deafness-and-hearing-loss)  
68 [loss](https://who.int/news-room/fact-sheets/detail/deafness-and-hearing-loss)). Sensorineural hearing loss (SNHL)—i.e., defective sound signaling in the  
69 auditory sensory system—can be caused by multiple etiologies, including genetic  
70 causes, congenital infections, trauma, ototoxic medications, and autoimmune  
71 disorders<sup>1</sup>. Since the 2010s, advances in high-throughput next-generation  
72 sequencing (NGS) technologies have facilitated extensive elucidation of the genetic  
73 backgrounds of SNHL, with a focus on monogenic forms of deafness. Notably,  
74 mouse genetics studies have helped reveal the physiological basis of SNHL in  
75 humans and the associated molecular functions<sup>2</sup>.

76           Despite growing recognition of the significance of genetic diagnosis of  
77 SNHL, it remains challenging to identify a genetic diagnosis in SNHL with substantial  
78 genetic heterogeneity<sup>3,4</sup>. NGS is increasingly favored for genetic diagnosis due to its  
79 capacity for simultaneous large-scale genetic loci screening, and methods like  
80 targeted panel sequencing (TPS) and whole-exome sequencing (WES) were widely  
81 used in real-world practice<sup>5-7</sup>. In the literature, targeted sequencing for SNHL has  
82 achieved diagnostic yields of between 12.7% and 64.3%<sup>8-11</sup>. However, even after  
83 exome sequencing, approximately 50% of cases remain genetically elusive.

84           As the cost of sequencing dramatically declines<sup>12</sup>, the clinical application of  
85 whole-genome sequencing (WGS) becomes more feasible, which has a higher  
86 capability to detect a more diverse spectrum of genomic variants that had not

87 previously been captured by exome sequencing or other targeted approaches<sup>13,14</sup>.  
88 Recent studies have shown the clinical utility of WGS for the genetic diagnosis of  
89 several disorders and effectively shortening their diagnostic odyssey, increasingly  
90 considered as a first-line genetic test<sup>15-19</sup>. However, WGS is not yet widely applied in  
91 routine clinical settings for diagnosing patients with rare diseases, including SNHL,  
92 due to several limitations, such as the difficulties of rapid bioinformatic analysis and  
93 accurate clinical interpretation. Additionally, although whole genomes are sequenced,  
94 the analysis is often limited to in silico gene panels or the coding regions of the  
95 genome<sup>20</sup>.

96 In the present study, we comprehensively explored the genetic landscape of  
97 394 prospective SNHL families. Using a stepwise approach from single target gene  
98 analysis to WGS, we evaluated the additional diagnostic value of WGS. We  
99 implemented an automated WGS bioinformatics pipeline, integrating *in-house*  
100 algorithms with manual curation by both otologists and medical geneticists. This  
101 approach allowed comprehensive analysis of all variant types, and improved the  
102 diagnostic yield for previously undiagnosed patients. Further analysis of deep  
103 intronic regions identified novel pathogenic variants. These findings refined the  
104 genotype-phenotype landscape of SNHL, revealing the gene signatures based on  
105 phenotypes and identifying genotype-phenotype correlations at the level of inner ear  
106 molecular functions. Our results demonstrate the clinical utility of an integrated  
107 molecular diagnostic approach, including WGS, in real-world SNHL practice, paving  
108 the way toward precision medicine.

109

## 110 **Results**

### 111 ***A stepwise approach of genetic testing for patients with SNHL***

112 We conducted stepwise approach of genetic testing, sanger sequencing,  
113 TPS, WES, mitochondrial DNA (mtDNA) sequencing, multiplex ligation-dependent  
114 probe amplification (MLPA), and WGS, to prospectively recruited SNHL cohort (*n* of  
115 probands = 394; *n* of participants including probands and their family members = 750;  
116 **Supplementary Table 1**), including non-syndrome hearing loss (ns-SNHL; *n* = 341,  
117 86.5%), and syndromic hearing loss (s-SNHL; *n* = 53, 13.5%). Genetic testing was  
118 structured into five sequential steps (**Fig. 1 and Supplementary Fig. 1a**). In Step 1,  
119 we screened 22 variants from 10 classical deafness genes (*GJB2*, *SLC26A4*,  
120 *TMPRSS3*, *CDH23*, *OTOF*, *TMC1*, *ATP1A3*, *MPZL2*, *COCH*, and 12S rRNA). Among  
121 cohort, ns-SNHL patients (*n* = 341) were initially subjected to Step 1 and the ns-  
122 SNHL patients who remained undiagnosed after Step 1 (*n* = 295), and s-SNHL  
123 patients (*n* = 53) were then subjected to the next steps (Steps 2-1 and 2-2). In Step  
124 2-1, 99 and 249 patients with SNHL were subjected to TPS (including 246 genes)  
125 and WES, respectively. After that, undiagnosed patients with suggestive clinical  
126 features, including symmetric mild-to-moderate SNHL (*n* = 51)<sup>21</sup>, apparent branchio-  
127 oto-renal/branchio-otic (BOR/BO) syndrome (*n* = 2)<sup>22</sup>, radiological evidence of  
128 enlarged vestibular aqueduct (EVA) (*n* = 1), and suspicious mitochondria disorders  
129 (*n* = 11) were subjected to Step 2-2, including MLPA methods (*n* = 54) or mtDNA  
130 panel sequencing (*n* = 11). In Step 3-1, among patients who remained undiagnosed,  
131 all s-SNHL patients and a representative subset of ns-SNHL patients were selected  
132 for WGS using a well-thought-out sample size estimation with a stratified sampling  
133 approach (**Supplementary Fig. 1b**). For the remaining undiagnosed patients (*n* =  
134 100), deep intronic regions of SNHL-related genes were screened to identify

135 additional pathogenic variants in Step 3-2. After stepwise genetic testing, patients  
136 with suspected pathogenic genetic causes underwent subsequent bioinformatic  
137 analyses and curation. Multidisciplinary molecular board meetings, comprising both  
138 clinicians and genome scientists, were then conducted to confirm genetic diagnosis.

139

140 ***Incremental improvement in diagnostic yield through stepwise genetic testing***  
141 ***for SNHL***

142 Through comprehensive genetic testing, we incrementally improved the  
143 diagnostic yield in the cohort, identifying disease-causing variants in 219 families  
144 (55.6%; **Fig. 2a**). Following the stepwise approach, in Step 1, we identified causal  
145 variants in 46 out of 341 patients (diagnostic yield for Step 1: 13.5%; cumulative yield:  
146 11.7%). In Step 2-1, causal variants were found in 124 out of 348 patients  
147 (diagnostic yield for Step 2-1: 35.6%; cumulative yield: 43.1%), while Step 2-2  
148 revealed causal variants in 26 out of 65 patients (diagnostic yield for Step 2-2: 40%;  
149 cumulative yield: 49.7%). WGS was performed on 120 patients, identifying causal  
150 variants in additional 23 probands (20 in Step 3-1 and 3 in Step 3-2; diagnostic yield  
151 for Step 3: 19.2%; cumulative yield: 55.6%). Details of individual patients, including  
152 the performed tests, diagnostic outcomes, and identified variants, are summarized in

153 **Supplementary Table 2.**

154 Multivariate analysis revealed that the rate of genetic diagnosis was higher  
155 among patients with early identification of SNHL (adjusted odds ratio [OR], 1.32; 95%  
156 confidence interval [CI], 1.11–1.57) and those with a family history (adjusted OR,  
157 1.55; 95% CI, 1.31–1.82; **Fig. 2b and Supplementary Table 3**). Similarly, patients  
158 with syndromic features were more likely to have identified genetic variants (adjusted  
159 OR, 1.44; 95% CI, 1.17–1.70). In contrast, a lower rate of genetic diagnosis was

160 observed in patients with adult-onset SNHL (adjusted OR, 0.50; 95% CI, 0.35–0.68),  
161 asymmetric hearing loss (adjusted OR, 0.38; 95% CI, 0.18–0.64), and interaural  
162 asymmetry (adjusted OR, 0.43; 95% CI, 0.23–0.68). Additionally, in the context of  
163 WGS, several features were associated with a higher likelihood of achieving a  
164 genetic diagnosis (**Fig. 2c and Supplementary Table 4**). The multivariate analyses  
165 suggested that genetic diagnosis was significantly related to the presence of  
166 syndromic features (adjusted OR, 2.51; 95% CI, 1.15–5.04) and early identification  
167 through a failed newborn hearing screening (NHS) (adjusted OR, 2.35; 95% CI,  
168 1.13–4.97). In addition, the diagnostic yield significantly varied depending on the  
169 WGS approach. Trio-based WGS had a higher likelihood of identifying causal  
170 variants (adjusted OR, 3.71; 95% CI, 1.67–9.68), whereas singleton WGS was less  
171 effective (adjusted OR, 0.32; 95% CI, 0.12–0.71).

172 Further, we conducted the correlation analysis between the frequencies of  
173 causative variants among our cohort and population allele frequencies of the variants  
174 from public databases, such as the gnomAD<sup>23</sup> and KOVA<sup>24</sup> (Korean Variant Archive:  
175 Korean population database; **Fig. 2d**). We observed the strongest association with  
176 East Asians compared to other ethnicity groups within gnomAD, and a notably higher  
177 association with KOVA, suggesting that patient ethnicity should be considered in  
178 variant discovery. We discovered three outlier variants (*SLC12A3* p.Thr180Lys,  
179 *ESRRB* p.Arg382Cys, and *GJB2* p.Val37Ile) when comparing the variant frequencies  
180 with allele frequencies in KOVA (**Fig. 2e**). These variants have higher frequencies in  
181 the Korean population than in diagnosed patients, suggesting either their low  
182 penetrance features or the potential for functional pathogenicity despite its  
183 particularly higher allele frequencies<sup>25</sup>.

184 In conclusion, from Step 1 to Step 3-2, we identified the genetic causes of



185 SNHL in 219 out of 394 probands (55.6%), with 23 diagnoses made through WGS.  
186 Among the identified variants, deep intronic variants ( $n = 3$ ) and structural variants  
187 (SVs) ( $n = 11$ ) were predominantly detected through WGS, and 13 variants of  
188 uncertain significance (VUS) required functional assays to validate their  
189 pathogenicity (**Fig. 2f**).

190

### 191 ***Comprehensive characterization of causative variants in SNHL***

192 Using the genetic findings obtained through comprehensive stepwise  
193 genetic tests, we illustrated a mutational landscape of SNHL. Collectively, 63 genes  
194 were identified as disease-causing within 219 genetically diagnosed families (**Fig. 3a**  
195 **and Supplementary Fig. 2a**). *GJB2* was the most frequently affected gene (10.5%,  
196 23/219), followed by five genes (*SLC26A4*, *STRC*, *USH2A*, *CDH23*, and *MPZL2*)  
197 that were found in at least ten unrelated families (collectively >40% of all diagnosed  
198 cases). Conversely, 29 SNHL-associated genes were detected from only one family  
199 (collectively 13.2%; 29/219; **Supplementary Fig. 2a**), suggesting that many more  
200 rare genes can cause SNHL. The inheritance patterns of the 63 genes included  
201 autosomal recessive (26/63 genes; affecting 132 families; found double hits,  
202 including homozygote and compound heterozygote variants), autosomal dominant  
203 (33/63 genes; affecting 73 families; found single hit), X-linked (4/63 genes; affecting  
204 6 families), and mitochondrial (3/63 genes; affecting 8 families) (**Fig. 3a**). Within our  
205 cohort, three identified genes—*TECTA*, *COL4A3*, and *WFS1*—exhibited both  
206 autosomal recessive and autosomal dominant inheritance traits. Moreover, one  
207 patient exhibited dual genetic etiologies, inherited from their parents, harboring  
208 compound heterozygous variants (c.299del:p.His100LeufsTer12 and  
209 c.235del:p.Leu79CysfsTer3) in *GJB2* and a heterozygous variant

210 (c.113G>A;p.Gly38Asp) in *COCH*.

211 **Fig. 3b** and **Supplementary Fig. 2b** display the mutational landscapes of  
212 the 352 causative variants, including the variant type. Among the 352 identified  
213 variants, we found missense variants (157, 44.6%), nonsense variants (51, 14.5%),  
214 frameshift variants (63, 17.9%), and inframe variants (10, 2.8%) within the exome  
215 region. Additionally, splicing variants (27, 7.7%), SVs (36, 10.2%), and mitochondrial  
216 variants (8, 2.3%) were identified. Interestingly, we observed differences in the  
217 distribution of variant types across genes. In particular, consistent with previous  
218 reports, SVs accounted for (20/30, 66.7%) of the total variants in the *STRC* gene.

219 Among the 352 causative variants (190 when the same variants were  
220 collapsed), 83 variants were novel (**Fig. 3c**). All of the 352 variants were either  
221 pathogenic (P) or likely pathogenic (LP) according to the American College of  
222 Medical Genetics and Genomics (ACMG) and Association for Molecular Pathology  
223 (AMP) guidelines (**Supplementary Table 5**)<sup>26</sup>. A variety of functional studies—  
224 ranging from molecular modeling to minigene splicing assay—were performed to test  
225 16 highly suggestive variants (**Supplementary Table 6**), leading to the  
226 reclassification of 13 variants from “uncertain significance” to “likely pathogenic”. An  
227 analysis of the variant type distribution among the 83 novel variants revealed that  
228 SVs, detected mostly through WGS, accounted for a much larger proportion (12.0%)  
229 compared to previously reported variants (2.8%) (**Fig. 3d**). In addition, we observed  
230 an increasing trend in the proportion of patients with novel variants as the steps  
231 progressed from Step 1 to Step 3-2 (**Fig. 3e**).

232 Novel SVs identified from WGS include exonic deletions on *SPATA5* and  
233 *CLCNKA-CLCNKB* (**Figs. 3f and 3g**). In one patient (SNUH 799), WGS identified a  
234 small SV (c.2227-3015\_2354+1415del) exclusively involving exon 15 of *SPATA5* (**Fig.**

235 **3f)**, along with an *in trans* short frameshift deletion in exon 16 (c.2679\_2680del).  
236 Notably, consistent with a previous case report<sup>27</sup>, this patient exhibited systemic  
237 clinical manifestations, including bilateral moderately severe SNHL, intractable  
238 epilepsy with diffuse brain atrophy, and global developmental delay (**Supplementary**  
239 **Fig. 3a**). Next, we investigated the molecular consequences of the small SV (c.2227-  
240 3015\_2354+1415del) on *SPATA5*-dependent bioenergetics using Seahorse assays  
241 (**Supplementary Fig. 3b**). The oxygen consumption rate (OCR) showed reduced  
242 respiratory function in patient fibroblasts, with significant decreases observed in  
243 basal respiration ( $P < 0.001$ ), maximal respiration ( $P < 0.001$ ), and ATP production ( $P$   
244  $< 0.001$ ) compared to control mother fibroblasts (**Supplementary Fig. 3c**). These  
245 findings suggest that the small deletion in *SPATA5* (c.2227-3015\_2354+1415del)  
246 contributes to impaired mitochondrial function leading to SNHL.

247

#### 248 ***Advanced WGS approach revealed additional deep intronic variants***

249 We sought to analyze the variant status of undiagnosed SNHL patients,  
250 even after the automated WGS pipeline (Step 3-1 in **Fig.1**) had been performed.  
251 Specifically, we examined the frequency of carriers for autosomal recessive SNHL-  
252 related genes (**Supplementary Fig. 4a**) in these undiagnosed patients and  
253 compared it to the carrier status in control cohorts (HC1: patients with hepatocellular  
254 carcinoma, n = 553, HC2: patients with breast cancer, n = 571; **Fig. 4a**). Throughout  
255 the analysis, we focused on identifying candidate pathogenic variants in accordance  
256 with ACMG guidelines (P/LP variants) and rare variants (minor allele frequency; MAF  
257  $< 1\%$ ) predicted to have a high impact. These included transcript ablation, splice  
258 variants, start lost, stop gained/lost, frameshift variants, transcript amplification,  
259 feature elongation/truncation, and exon-disrupting SVs or transposable elements

260 (TEs). Subsequently, for SNHL patients with a pathogenic variant on a single allele  
261 after Step 3-1, we concentrated on identifying additional pathogenic variants on the  
262 opposite allele in Step 3-2. Specifically, *in silico* splicing variant predictions were  
263 performed using SpliceAI<sup>28</sup> on intronic variants (MAF < 1%) identified in SNHL  
264 carriers. This approach aimed to detect potential splice-affecting variants that may  
265 have been overlooked in previous analyses.

266           The analysis revealed that the carrier rate for pathogenic variants in SNHL-  
267 related genes was significantly higher in the undiagnosed SNHL patient group  
268 compared to the two control cohorts (**Fig. 4b**). Additionally, an evaluation of the MAF  
269 of the identified candidate pathogenic variants showed that variants found in the  
270 undiagnosed SNHL group were rarer than those in the control group (**Fig. 4c**).  
271 Subsequent screening for deep intronic variants in undiagnosed SNHL patients  
272 identified three *in trans* variants with SpliceAI prediction scores greater than 0.2.  
273 These included deep intronic variants in *USH2A* (c.7120+1475A>G, c.14134-  
274 3169A>G, and c.4628-26037A>G), each found in different patients (SNUH 485,  
275 SNUH 503, and SNUH 513, respectively; **Fig. 4d and Supplementary Fig. 4b-c**). To  
276 evaluate their pathogenicity, minigene assays were designed with specific splice  
277 donor (SD) and splice acceptor (SA) sites. The assays revealed that these variants  
278 induce aberrant splicing that leads to the inclusion of pseudoexons of varying sizes:  
279 267 bp for c.7120+1475A>G, 50 bp for c.14134-3169A>G, and 96 bp for c.4628-  
280 26037A>G (**Fig. 4e-f**). The resulting aberrant transcripts are predicted to contain  
281 premature stop codons, leading to truncated, non-functional usherin protein (**Fig. 4g**).  
282 Combined with first hits of the coding variant in this *USH2A* gene (c.10712C>T,  
283 c.14835del, and coding deletion, respectively), these alleles of *USH2A* were  
284 inactivated in these patients.

285

286 ***Genotype-phenotype correlations through molecular function-based gene***  
287 ***clustering***

288           Based on the genetic diagnoses identified through comprehensive genetic  
289 analysis, we investigate the relationship between the affected genes and clinical  
290 manifestations. We found that causal genes of SNHL were closely linked to specific  
291 clinical manifestations, with 22 genes contributing to clinical manifestations in  $\geq 3$   
292 families (**Supplementary Fig. 5a**). The genotype-phenotype map revealed a list of  
293 SNHL genes that represent the major attributes of SNHL phenotypes, with over 50%  
294 of affected patients harboring variants in the same gene (**Supplementary Fig. 5b**).  
295 Although variants within the same causative gene can manifest allelic and clinical  
296 heterogeneity<sup>29,30</sup>, information about signature genes associated with distinct clinical  
297 phenotypes may aid in conducting in-depth genetic analyses within the highly  
298 heterogeneous genetic landscape of SNHL.

299           Based on these genotype-phenotype correlation, we further analyzed the  
300 phenotypic heterogeneity of SNHL according to causal genes considering the  
301 functions of the genes in the inner ear. The 63 SNHL-related genes were classified  
302 into eight categories based on inner ear molecular functions (**Fig. 5a and**  
303 **Supplementary Fig. 5c**)<sup>31</sup>: (1) hair bundle development and function; (2) synaptic  
304 transmission; (3) hair cell adhesion and maintenance; (4) cochlear ion homeostasis;  
305 (5) transmembrane and extracellular matrix; (6) oxidative stress, autoinflammation,  
306 and mitochondrial defect; and (7) transcriptional regulation. To evaluate the  
307 relationships between genes across categories, we compared gene expression  
308 patterns using publicly available transcriptome data from human inner ear organoids  
309 and human cochlear and vestibular organs<sup>32</sup>. Comparative analysis of gene

310 expression patterns through perturbation testing revealed trends ( $P = 0.07$ ) in  
311 expression across gene categories (**Fig. 5b**).

312 Interestingly, post-hoc analysis revealed that four phenotypic attributes  
313 (syndromic features, mixed hearing loss, and hearing loss onset) were significantly  
314 associated with pathogenic variants in the categories (**Figs. 5c-d and**  
315 **Supplementary Table 7**). Causal genes more prevalent among patients with  
316 syndromic features (i.e., *EYA1*, *SIX1*, and *MT-TL1*) were significantly enriched in  
317 categories 6 and 7. These findings were in line with the cell type specificities of the  
318 genes, since genes in categories 6 and 7 are more broadly expressed in multiple  
319 organs and cell types (**Supplementary Fig. 6a**). Genes associated with mixed type  
320 manifestation (i.e., *POU3F4*, *EYA1*, and *SIX1*) were more prevalent in category 7  
321 compared to in category 1 ( $P = 0.001$ ). We speculate that the genes associated with  
322 transcriptional regulation may affect the development of the second branchial arch of  
323 the middle ear, and the third window of the inner ear, accounting for conductive  
324 components of hearing loss. Furthermore, genes associated with early identification  
325 of hearing loss onset were more predominant in category 4 compared to in category  
326 3 ( $P=0.001$ ). It is likely that major genes in category 4 (i.e., *GJB2* and *SLC26A4*) or  
327 their encoded proteins play a critical role during the embryonic stage of inner ear  
328 development, whereas major genes in category 3 (i.e., *MPZL2* and *KCNQ4*) or their  
329 encoded proteins act primarily in postnatal period. Collectively, these data support  
330 the development of a comprehensive genotype-phenotype map of SNHL, and shed  
331 light on insights of previously undefined genotype-phenotype correlations.

## 332 Discussion

333 Unlike previous cohort studies limited by the heterogeneous nature of  
334 phenotypes<sup>33,34</sup>, our present findings provide a robust estimate of diagnostic rates  
335 through a stepwise genetic testing approach from single-gene analysis to WGS,  
336 integrated with functional assays and bioinformatic analysis, in a relatively large  
337 cohort of patients with a single phenotype of SNHL. Herein, we demonstrated an  
338 additional diagnostic yield of 19.2% (23/120) through the systematic application of  
339 WGS in previously undiagnosed SNHL patients who had undergone exome  
340 sequencing and targeted assays. Specifically, even among undiagnosed SNHL  
341 patients following an automated WGS pipeline (Step 3-1), we observed that the  
342 frequency of genome-wide single pathogenic allele in known recessive deafness  
343 genes was higher than in control cohorts. Based on these findings, we hypothesized  
344 that this elevated frequency of single pathogenic alleles (43%) is less likely to be  
345 incidental carrier variants and instead suggests the presence of a second,  
346 undetected hit in the opposite allele. Consequently, through SpliceAI-based deep  
347 intronic variants analysis (Step 3-2), we identified 3 meaningful deep intronic variants  
348 among 100 patients, including three *USH2A* deep intronic variants confirmed to be  
349 causative. These findings suggest the potential for further diagnosis of undiagnosed  
350 cases through additional molecular diagnostic approaches, such as multi-omics and  
351 methylation sequencing analyses, thereby accelerating the diagnostic process.  
352 Supporting this, Lunke et al. have shown the potential of the integration of multi-omic  
353 approaches into genomic testing, leading to additional diagnoses and changed  
354 critical care management<sup>35</sup>.

355 We identified the genetic causes of SNHL in 55.6% of our cohort families,  
356 with WGS and SpliceAI-based deep intronic variants analysis increasing the overall

357 diagnostic yield by more than 5%. The improved diagnostic yield through WGS and  
358 in-depth analysis has been made possible by screening regions that are challenging  
359 to detect with conventional methods, primarily including deep intronic variants, small  
360 SVs, copy-neutral inversions, and complex genomic rearrangements. Among the 23  
361 families with additional diagnoses identified through WGS and in-depth analysis, 16  
362 cases (69.6%) could be diagnosed through reanalysis of targeted sequencing data  
363 and exome-based CNV algorithms. However, 7 (30.4%) of these cases required  
364 genome sequencing for a definitive diagnosis. Our study further provides clinical  
365 guidelines for selecting SNHL patients who are most likely to benefit from WGS.  
366 WGS proved more effective for genetic completion in SNHL patients with early-onset  
367 or syndromic features, regardless of audiological characteristics (e.g., severity and  
368 configuration), with trio-based WGS providing higher diagnostic yield.

369 Genetic diagnosis of SNHL is helpful not only for understanding clinical  
370 manifestations but also for planning treatment options. Genetic information could  
371 serve as a guide to clinical phenotypes and their natural course, highlighting the  
372 importance of WGS in identifying additional genetic causes in undiagnosed patients.  
373 In detail, early identification of genetic causes may be necessary for detecting  
374 preclinical symptoms (e.g., ns-SNHL mimics)<sup>30</sup>, and for providing reproductive  
375 counseling, including guidance on next-baby planning and options for  
376 preimplantation genetic testing, even in cases of nonsyndromic hearing loss<sup>36</sup>.  
377 Although targeted agents based on genotype are not yet commonly established in  
378 many human genetic disorders, there have been significant advances in  
379 personalized targeted therapy in recent years, including in the field of genetic  
380 hearing loss<sup>37-41</sup>. For example, three presently identified genomic variants in the  
381 deep intronic region of *USH2A* are targetable by splice-switching antisense



382 oligonucleotide therapy (ASOs), offering an opportunity to slow down or even halt  
383 disease progression in these patients. According to a framework for individualized  
384 splice-switching ASO therapy<sup>42</sup>, the *USH2A* deep intronic variants that induce  
385 pseudoexon inclusion without disrupting cryptic splicing sites were highly amenable  
386 to ASO splice modulation. Furthermore, in theory, a subset of SVs—such as the  
387 *EYA1* paracentric inversion (SNUH 734) and *EYA1* complex genomic  
388 rearrangements (SNUH 536) linked to haploinsufficiency detected in WGS—can be  
389 corrected using CRISPR-based editing approaches, including Cas9 nuclease with  
390 paired gRNAs, CRISPR activation, and prime editing strategy<sup>43-45</sup>. The present study  
391 provides good examples of the potential of inner ear precision medicine for SNHL  
392 treatment, with broadened therapeutic targets identified through WGS and in-depth  
393 analysis.

394         Our comprehensive genomic investigation further refined the genotype-  
395 phenotype landscape of SNHL, revealing gene signatures based on phenotypes.  
396 The distribution of phenotype-based signature genes identified in this study largely  
397 aligns with findings from exome-based SNHL cohort studies. While this genetic  
398 information could support genetic diagnosis and provide a rationale for in-depth  
399 analysis in the clinical setting, further studies with larger cohorts are essential to  
400 establish more specific phenotype-genotype correlations that account for variant  
401 effects (e.g., allelic hierarchy). Furthermore, we found that genotype-phenotype  
402 correlations were also present at the level of the molecular pathways of the genes in  
403 the inner ear. The inner ear molecular functions within distinct subcategories of  
404 genetic hearing loss were found to correlate with the single-cell expression patterns  
405 of identified deafness genes. This new framework of genetic hearing loss suggests  
406 that genes within each functional class exhibit not only distinct inner ear molecular

407 functions but also relatively homogeneous spatial expression patterns in the cochlea.  
408 Unlike traditional genotype-phenotype correlations, which are often limited by  
409 specific ethnicities, genotypes, or phenotypes, the classification based on inner ear  
410 molecular pathways expands beyond the current understanding of SNHL and  
411 provides insights for predicting phenotypes associated with newly identified deafness  
412 genes.

413           Collectively, our results provide evidence for the clinical utility of the  
414 integrated diagnostic approaches, including WGS, in real-world SNHL practice to  
415 fully recognize the genomic architectures and associated phenotypic attributes,  
416 paving the way toward precision medicine to come.  
417

418 **Methods**

419 **Study cohort**

420 In this study, we utilized a prospective research design and focused on  
421 participants attending the Hereditary Hearing Loss Clinic within the  
422 Otorhinolaryngology division of the Center for Rare Diseases, Seoul National  
423 University Hospital, Korea, between March 2021 and February 2023 (**Fig. 1**).  
424 Patients were not included if they were referred from other centers with confirmed  
425 genetic diagnoses or diagnosed as conductive hearing loss. In total, our SNHL  
426 cohort comprised 394 unrelated families and 750 individuals including probands,  
427 who exhibited hearing loss with sensorineural components, and their family  
428 members. The demographic data and clinical phenotypes were retrieved from the  
429 electronic medical records. The onset of hearing loss was classified into three  
430 distinct categories<sup>46</sup>: early identification (i.e., congenital or prelingual deafness  
431 identified through failed newborn hearing screening test), delay identification (i.e.,  
432 pediatric-onset deafness occurring by age 18 that does not meet the criteria for early  
433 identification, regardless of newborn hearing screening confirmation), and adult  
434 identification (i.e., documented adult-onset hearing loss). The syndromic features of  
435 the patients in the cohort were evaluated during their first outpatient clinic visit based  
436 on their medical histories and/or features in their clinical manifestations. The  
437 presence of associated medical conditions (e.g., syndromic hearing loss) was  
438 determined using the Tenth Revision of the International Statistical Classification of  
439 Diseases and Related Health Problems (ICD-10) codes. All procedures were  
440 approved by the Institutional Review Board of Seoul National University Hospital (no.  
441 IRB-H-0905-041-281 and IRB-H-2202-045-1298).

442

#### 443 **Audiological evaluation**

444            Depending on the participant's age, the hearing thresholds for six different  
445 octaves (0.25, 0.5, 1, 2, 4, and 8 kHz) were evaluated using pure-tone audiometry  
446 (PTA)<sup>47</sup>. For patients under 3 years of age or having neurodevelopmental delay,  
447 auditory brainstem response threshold (ABRT) and auditory steady-state response  
448 (ASSR) were used to gauge the thresholds at four-octave frequencies (0.5, 1, 2, and  
449 4 kHz). The conductive components were evaluated using comprehensive tests,  
450 including tympanic membrane examination, tympanometry (probe tones of 226 and  
451 1000 Hz), and/or bone conduction ABRT, particularly in younger subjects. Auditory  
452 profiles were retrieved—such as asymmetry, severity, configuration, and progression.  
453 The mean hearing threshold was determined using an average of the thresholds at  
454 0.5, 1, 2, and 4 kHz, and the degree of hearing loss was categorized as mild-to-  
455 moderate (21-40 dB or  $\leq 20$  dB with high-frequency hearing loss), moderate-to-  
456 severe (41-70 dB, and severe-to-profound ( $\geq 71$  dB)<sup>47</sup>. Audiogram configurations  
457 were categorized into one of five subtypes: down-sloping (i.e., consistent downward  
458 trend observed across 250, 500, 1000, 2000, and 4000 Hz frequencies, with an  
459 average threshold at 250 and 500 Hz  $\leq 40$  dB), ski-sloping (i.e., thresholds at 250 Hz  
460 are  $\leq 25$  dB, with a decrease of  $\geq 40$  dB between 250–1 kHz or 500–2 kHz, or a  
461 decrease of  $\geq 70$  dB across 250–4 or 8 kHz), cookie-bite (i.e., U-shaped), up-sloping  
462 (i.e., rising), and flat (i.e., audiograms that does not fit down-sloping, ski-slope,  
463 cookie-bite, or up-sloping configurations)<sup>48</sup>. Asymmetric hearing loss was defined as  
464 severe-to-profound hearing loss in the poorer ear, with an average hearing threshold  
465  $>30$  dB HL and  $<55$  dB HL in the better ear. The presence of interaural asymmetry (a  
466 difference in average between the poorer ear and the better ear of 15 to less than 30  
467 dB, and a difference in average between the poorer ear and the better ear of 30 or

468 more than 30 dB) was also assessed<sup>49</sup>. To analyze hearing loss progression, serial  
469 audiograms were used to retrieve the hearing threshold at all frequencies. Hearing  
470 loss progression was assessed in cases with two or more audiograms documented  
471 during the follow-up period, with at least a one-year interval between documentation.  
472 Cases with only one audiogram or follow-up duration of less than 1-year were  
473 classified as not available (i.e., N/A). Profound SNHL with thresholds  $\geq 90$  dB at 500  
474 Hz was classified as not determined (i.e., N/D). Hearing loss progression in this  
475 study was categorized as substantial ( $\geq 10$  dB deterioration at three or more  
476 frequencies), mild ( $\geq 5$  dB deterioration at three or more frequencies or  $\geq 10$  dB  
477 deterioration at one or two frequencies), and none (if neither substantial nor mild  
478 criteria were met).

479

#### 480 **Real-time polymerase chain reaction and *GJB2* sequencing**

481 Genomic DNA was extracted from peripheral blood samples utilizing the  
482 Chemagic 360 instrument (Perkin Elmer, Baesweiler, Germany). Real-time  
483 polymerase chain reaction (PCR) was performed using the U-TOP™ HL Genotyping  
484 Kit Ver1 and Ver2, along with a CFX96 Real-Time PCR Detection System (Bio-Rad,  
485 Hercules, CA, USA)<sup>50,51</sup>. This process was used to examine 22 pathogenic variants  
486 across 10 deafness genes. The data collected from this procedure were analyzed  
487 using Bio-Rad CFX manager v1.6 software. Variants were identified through the  
488 fluorescence signals from the detection probes, which corresponded to the melting  
489 temperature ( $T_m$ ), as specified by the standard protocol in the manufacturer's  
490 manual. We additionally conducted sequencing of the *GJB2* single gene, following a  
491 previously described method<sup>52</sup>.

492

### 493 **Targeted panel sequencing and whole-exome sequencing**

494 We utilized TPS or WES to sequence the exonic regions of SNHL-related  
495 genes. The target regions were captured using a SureSelect DNA targeted  
496 sequencing panel for TPS, and a SureSelectXT Human All Exon V5 for WES (Agilent  
497 Technologies, Santa Clara, CA, USA). A library was prepared following the  
498 manufacturer's instructions, and was paired-end sequenced using a NovaSeq 6000  
499 sequencing system (Illumina, San Diego, CA, USA).

500 Sequence reads were aligned to the human reference genome (GRCh38)  
501 and processed according to the Genome Analysis Toolkit (GATK) best-practice  
502 pipeline for calling single nucleotide variants (SNVs) and short insertions/deletions  
503 (indels)<sup>53</sup>. The ANNOVAR program was used for variant annotation, such as the  
504 RefSeq gene set and Genome Aggregation Database (gnomAD)<sup>23,54</sup>. Rare non-silent  
505 variants were selected as candidates, including nonsynonymous SNVs, coding  
506 indels, and splicing variants. We also used the Korean Reference Genome Database  
507 (KRGDB) and KOVA databases for further filtration of ethnic-specific variants<sup>24,55</sup>.  
508 Additionally, the ClinVar and HGMD databases were screened to check whether  
509 candidate variants had been previously identified in other patients<sup>56,57</sup>.

510 We classified candidate variants according to the ACMG-AMP guidelines  
511 using the InterVar program<sup>26,58</sup>, and manually curated the classifications following the  
512 modified guidelines for SNHL<sup>59</sup>.

513

### 514 **Multiplex ligation-dependent probe amplification and mitochondria panel** 515 **sequencing**

516 For individuals displaying non-syndromic, symmetric, mild-to-moderate  
517 SNHL, we evaluated copy number variations (CNVs) using the SALSA MLPA

518 Probemix P461-B1 *STRC-CATSPER2-OTOA* (MRC-Holland, Amsterdam,  
519 Netherlands)<sup>21</sup>. Additionally, for patients showing evidence of EVA on temporal bone  
520 CT and/or internal acoustic canal MRI and clinical features of BOR/BO syndrome,  
521 we performed *SLC26A4* and *EYA1* MLPA tests, respectively, using the SALSA MLPA  
522 Probemix P280-B4 *SLC26A4* and the SALSA MLPA Probemix P153-B2 *EYA1* (MRC-  
523 Holland). We analyzed the amplification products using an ABI PRISM 3130 Genetic  
524 Analyzer (Applied Biosystems, Foster City, CA, USA) and interpreted the results  
525 using Gene Marker 1.91 software (SoftGenetics, State College, PA, USA).

526 For mitochondria panel sequencing, DNA was extracted from peripheral  
527 blood samples using the Chemagic 360 instrument (Perkin Elmer, Baesweiler,  
528 Germany). The complete human mitochondrial genome was amplified in two  
529 overlapping fragments: fragment I (spanning 9,289 bp), and fragment II (spanning  
530 7,626 bp). Fragment 1 was amplified using the primer pair hmtF1 569 (5'-  
531 AACCAAACCCCAAAGACACC-3') and hmtR1 9819 (5'-  
532 GCCAATAATGACGTGAAGTCC-3'), and fragment II was amplified using the primer  
533 pair htmF2 9611 (5'-TCCCCTCCTAAACACATCC-3') and hmtR2 626 (5'-  
534 TTTATGGGGTGATGTGAGCC-3')<sup>60</sup>. PCR reactions were conducted using the  
535 following cycling parameters: initial denaturation at 94 °C for 2 min; 10 cycles of  
536 94 °C for 15 s, 65 °C for 30 s, and 68 °C for 5 min; 25 cycles of 94 °C for 15 s, 65 °C  
537 for 30 s, and 68 °C for 5 min; and a final extension at 68 °C for 7 min. Subsequently,  
538 a library was generated using the Nextera DNA Flex Library Prep Kit (Illumina)  
539 following the manufacturer's instructions. Paired-end sequencing was performed with  
540 the generation of 150-bp reads on the MiSeq platform (Illumina). Bioinformatic  
541 processes, including alignment and annotation, were performed using NextGene  
542 Version 2.4.0.1 (Softgenetics).

543

#### 544 **Selection of the target population for whole-genome sequencing**

545 All patients with s-SNHL ( $n = 21$ ) who remained undiagnosed after exome  
546 sequencing and other techniques underwent WGS. Conversely, in patients with ns-  
547 SNHL ( $n = 177$ ) who remained undiagnosed, we determined the sample  
548 representativeness for WGS. First, we estimated the sample size with a 7% margin  
549 of error and a 95% CI. Second, we employed a probability sampling method,  
550 specifically stratified sampling, considering a significant heterogeneity of SNHL  
551 patients with respect to audiological characteristics. Relevant covariates, including  
552 SNHL onset, severity, and asymmetry phenotypes, were used as criteria for  
553 stratification. Thus, for the 177 undiagnosed ns-SNHL patients, a representative  
554 validation was conducted, and WGS was ultimately performed on 99 families,  
555 exceeding the required sample size of 94, which corresponds to a 7% margin of  
556 error and a 95% CI. A representative sample was then obtained by randomly  
557 sampling within each stratum. Chi-square tests were conducted to assess  
558 differences across these strata. Overall, our methodology combines a well-thought-  
559 out sample size estimation with a stratified sampling approach and proper statistical  
560 validation, making it a robust approach for selecting a representative sample for  
561 WGS in undiagnosed ns-SNHL patients.

562

#### 563 **Library construction and automated analytic pipeline for whole-genome** 564 **sequencing**

565 To obtain genomic DNA, peripheral blood samples were collected from  
566 probands with or without their parents. The entire process of genome sequencing,  
567 analysis, and interpretation was performed using the RareVision™ system (Inocras,



568 San Diego, CA, USA). Genomic DNA was extracted from blood samples using the  
569 Allprep DNA/RNA kits (Qiagen, Venlo, Netherlands). DNA libraries were prepared  
570 using TruSeq DNA PCR-Free Library Prep Kits (Illumina) and sequenced on the  
571 Illumina NovaSeq6000 platform with an average depth of coverage of 30x. The  
572 obtained genome sequences were aligned to the human reference genome  
573 (GRCh38) using the BWA-MEM algorithm. PCR duplicates were removed using  
574 SAMBLASTER<sup>61</sup>. The initial mutation calling for base substitutions and short indels  
575 was performed using HaplotypeCaller and Strelka2, respectively<sup>62</sup>. SVs were  
576 identified using Delly. Variants were filtered, and their Mendelian inheritance patterns  
577 were assessed. De novo mutations were detected, and their potential impacts were  
578 predicted. The pathogenicity prediction was further enhanced by using in-house-  
579 developed software that automatically integrates updated databases. The final  
580 evaluation of variant pathogenicity was determined by medical geneticists,  
581 considering the patient's phenotype and familial history.

582

### 583 **In vitro splicing analysis using minigene assay**

584 Fragments carrying the *USH2A* intron 37 reduced to 916 bp containing  
585 c.7120+1475A or c.7120+1475A>G, and intron 64 reduced to 845 bp containing  
586 c.14135-3169A or c.14135-3169A>G, were amplified and cloned into the pSPL3  
587 vector, between the exon splice donor (SD) and splice acceptor (SA), using the  
588 EcoRI and NdeI restriction sites. Human epithelial kidney 293T (HEK293T) cells  
589 were seeded in a six-well culture plate and incubated at 37 °C in a 5% CO<sub>2</sub>  
590 atmosphere in Dulbecco's modified Eagle's medium (LM001-05; Welgene,  
591 Gyeongsan, Korea) containing 10% fetal bovine serum (12483-020; Gibco, Carlsbad,  
592 CA, USA), 100 units/mL penicillin/streptomycin (LS015-01; Welgene), and 2 mM L-

593 glutamine (LS002-01; Welgene). On the next day, the cells were transfected with 2  
594  $\mu\text{g}$  pSPL3 plasmid using Lipofectamine 3000 reagent (L3000001; Invitrogen,  
595 Carlsbad, CA, USA), according to the manufacturer's guidelines. After 24 hours, the  
596 cells were harvested, and the total RNA was extracted using TRIzol Reagent  
597 (15596026; Invitrogen) and chloroform. From 1  $\mu\text{g}$  RNA, cDNA was prepared by  
598 reverse transcription using the Accupower RT-preMix (K-2041; Bioneer, Daejeon,  
599 Korea). Splicing analysis was performed by PCR amplification with Taq DNA  
600 Polymerase (E-2011-1; Bioneer) using the following vector-specific primers: SD6  
601 (5'-TCTGAGTCACCTGGACAACC-3') and SA2 (5'-  
602 ATCTCAGTGGTATTTGTGAGC-3').

603

#### 604 **Fibroblast cell culture**

605 A skin biopsy was obtained from a donor under local anesthesia and  
606 preserved in Phosphate Buffered Saline (PBS). The biopsy was divided into 9-12  
607 distinct segments and seeded into a 12-well plate containing DMEM supplemented  
608 with 20% FBS. Once the segments reached confluence, fibroblasts were harvested  
609 for further expansion.

610

#### 611 **Oxygen consumption rate**

612 Cellular OCR was measured in real-time using the Seahorse XF96  
613 Extracellular Flux Analyzer (Seahorse Bioscience, North Billerica, MA, USA) per the  
614 manufacturer's protocol. Cells ( $8.0 \times 10^3$  fibroblasts) were seeded in 100  $\mu\text{L}$  of  
615 growth medium in Seahorse 96-well microplates and incubated at 37 °C with 5%  
616 CO<sub>2</sub> for 24 hours. Prior to the assay, cells were washed with assay running media  
617 (unbuffered DMEM supplemented with 25 mM glucose, 1 mM glutamine, and 1 mM

618 sodium pyruvate) and equilibrated in a non-CO<sub>2</sub> incubator overnight. Calibration of  
619 the assay plate was performed overnight in a non-CO<sub>2</sub> incubator. Once calibrated,  
620 the cell plate replaced the assay plate, and OCR was measured simultaneously. The  
621 assay protocol involved sequential injection of four compounds to modulate  
622 mitochondrial function and determine parameters such as basal respiration, maximal  
623 respiration, and ATP production: oligomycin (1 μM), an ATP synthase inhibitor for  
624 maximal glycolytic metabolism; carbonyl cyanide p-(trifluoromethoxy)  
625 phenylhydrazone (FCCP) (1 μM), an ETC and OXPHOS uncoupler for peak oxygen  
626 consumption and oxidative metabolism; rotenone and antimycin A (both at 1 μM),  
627 inhibitors of ETC complexes I and III respectively, for non-mitochondrial respiration  
628 assessment. The Seahorse analyzer recorded OCR values throughout the assay to  
629 monitor cellular metabolic activity in real-time.

630

### 631 **Statistical analyses**

632 We used the Pearson chi-square test to identify variables that could  
633 potentially differentiate between the genetically diagnosed and undiagnosed groups.  
634 Following the computation of the OR and 95% CI for each value, we conducted a  
635 logistic regression analysis, considering only the variables with *P* values of <0.05.  
636 This approach facilitated the derivation of the adjusted OR. We also classified the 63  
637 SNHL-associated genes that were identified during this study based on the  
638 molecular mechanisms of inner-ear function. To verify the variance between groups  
639 according to clinical phenotypes, we used the Pearson chi-square test. Finally, we  
640 used Fisher's exact test based on the false discovery rate (FDR) to identify  
641 statistically significant groups characterized by an adjusted *P* value of <0.05. In this  
642 study, we define variables exhibiting *P* values of <0.05 as statistically significant.

643 Statistical analyses and visualizations were conducted using R Version 4.2.2, and  
644 the corresponding code can be accessed at [https://github.com/SNUH-](https://github.com/SNUH-hEARgeneLab/WGS_analysis)  
645 [hEARgeneLab/WGS analysis](https://github.com/SNUH-hEARgeneLab/WGS_analysis).

646

647 **Data availability:**

648 The data generated in this study are available in the Source Data file, which  
649 is provided with this paper.

650

651 **References**

- 652 1 Lieu, J. E. C., Kenna, M., Anne, S. & Davidson, L. Hearing Loss in Children: A  
653 Review. *JAMA* **324**, 2195-2205 (2020).  
654 <https://doi.org/10.1001/jama.2020.17647>
- 655 2 Bowl, M. R. *et al.* A large scale hearing loss screen reveals an extensive  
656 unexplored genetic landscape for auditory dysfunction. *Nature*  
657 *communications* **8**, 886 (2017).
- 658 3 Pinero, J. *et al.* The DisGeNET knowledge platform for disease genomics:  
659 2019 update. *Nucleic Acids Res* **48**, D845-D855 (2020).  
660 <https://doi.org/10.1093/nar/gkz1021>
- 661 4 Martin, A. R. *et al.* PanelApp crowdsources expert knowledge to establish  
662 consensus diagnostic gene panels. *Nat Genet* **51**, 1560-1565 (2019).  
663 <https://doi.org/10.1038/s41588-019-0528-2>
- 664 5 Adams, D. R. & Eng, C. M. Next-Generation Sequencing to Diagnose  
665 Suspected Genetic Disorders. *N Engl J Med* **379**, 1353-1362 (2018).  
666 <https://doi.org/10.1056/NEJMra1711801>
- 667 6 Pajusalu, S. *et al.* Large gene panel sequencing in clinical diagnostics-results  
668 from 501 consecutive cases. *Clin Genet* **93**, 78-83 (2018).  
669 <https://doi.org/10.1111/cge.13031>
- 670 7 Aspromonte, M. C. *et al.* Characterization of intellectual disability and autism  
671 comorbidity through gene panel sequencing. *Hum Mutat* **40**, 1346-1363  
672 (2019). <https://doi.org/10.1002/humu.23822>
- 673 8 Liao, E. N., Taketa, E., Mohamad, N. I. & Chan, D. K. Outcomes of Gene  
674 Panel Testing for Sensorineural Hearing Loss in a Diverse Patient Cohort.  
675 *JAMA Netw Open* **5**, e2233441 (2022).  
676 <https://doi.org/10.1001/jamanetworkopen.2022.33441>
- 677 9 Downie, L. *et al.* Exome sequencing in infants with congenital hearing  
678 impairment: a population-based cohort study. *Eur J Hum Genet* **28**, 587-596  
679 (2020). <https://doi.org/10.1038/s41431-019-0553-8>
- 680 10 Gu, X. *et al.* Genetic testing for sporadic hearing loss using targeted  
681 massively parallel sequencing identifies 10 novel mutations. *Clin Genet* **87**,  
682 588-593 (2015). <https://doi.org/10.1111/cge.12431>
- 683 11 Jung, J. *et al.* Genetic Predisposition to Sporadic Congenital Hearing Loss in

- 684 a Pediatric Population. *Sci Rep* **7**, 45973 (2017).  
685 <https://doi.org/10.1038/srep45973>
- 686 12 Pennisi, E. Upstart DNA sequencers could be a “game changer.”. *Science* **376**,  
687 1257-1258 (2022).
- 688 13 Retterer, K. *et al.* Clinical application of whole-exome sequencing across  
689 clinical indications. *Genetics in Medicine* **18**, 696-704 (2016).
- 690 14 Wojcik, M. H. *et al.* Genome Sequencing for Diagnosing Rare Diseases. *N*  
691 *Engl J Med* **390**, 1985-1997 (2024). <https://doi.org/10.1056/NEJMoa2314761>
- 692 15 Lee, S. *et al.* Whole genomic approach in mutation discovery of infantile  
693 spasms patients. *Front Neurol* **13**, 944905 (2022).  
694 <https://doi.org/10.3389/fneur.2022.944905>
- 695 16 Gallego-Martinez, A. *et al.* Using coding and non-coding rare variants to target  
696 candidate genes in patients with severe tinnitus. *NPJ Genom Med* **7**, 70  
697 (2022). <https://doi.org/10.1038/s41525-022-00341-w>
- 698 17 Huq, A. J. *et al.* Clinical impact of whole-genome sequencing in patients with  
699 early-onset dementia. *J Neurol Neurosurg Psychiatry* (2022).  
700 <https://doi.org/10.1136/jnnp-2021-328146>
- 701 18 Macken, W. L. *et al.* Specialist multidisciplinary input maximises rare disease  
702 diagnoses from whole genome sequencing. *Nat Commun* **13**, 6324 (2022).  
703 <https://doi.org/10.1038/s41467-022-32908-7>
- 704 19 van Eyk, C. L. *et al.* Yield of clinically reportable genetic variants in unselected  
705 cerebral palsy by whole genome sequencing. *NPJ Genom Med* **6**, 74 (2021).  
706 <https://doi.org/10.1038/s41525-021-00238-0>
- 707 20 Pagnamenta, A. T. *et al.* Structural and non-coding variants increase the  
708 diagnostic yield of clinical whole genome sequencing for rare diseases.  
709 *Genome Med* **15**, 94 (2023). <https://doi.org/10.1186/s13073-023-01240-0>
- 710 21 Kim, B. J. *et al.* Significant Mendelian genetic contribution to pediatric mild-to-  
711 moderate hearing loss and its comprehensive diagnostic approach. *Genetics*  
712 *in Medicine* **22**, 1119-1128 (2020).
- 713 22 Nam, D. W. *et al.* Molecular Genetic Etiology and Revisiting the Middle Ear  
714 Surgery Outcomes of Branchio-Oto-Renal Syndrome: Experience in a Tertiary  
715 Referral Center. *Otology & Neurotology* **44**, e319-e327 (2023).
- 716 23 Karczewski, K. J. *et al.* The mutational constraint spectrum quantified from

- 717 variation in 141,456 humans. *Nature* **581**, 434-443 (2020).  
718 <https://doi.org/10.1038/s41586-020-2308-7>
- 719 24 Lee, J. *et al.* A database of 5305 healthy Korean individuals reveals genetic  
720 and clinical implications for an East Asian population. *Exp Mol Med* **54**, 1862-  
721 1871 (2022). <https://doi.org/10.1038/s12276-022-00871-4>
- 722 25 Choi, W. H. *et al.* Functional pathogenicity of ESRRB variant of uncertain  
723 significance contributes to hearing loss (DFNB35). *Sci Rep* **14**, 21215 (2024).  
724 <https://doi.org/10.1038/s41598-024-70795-8>
- 725 26 Richards, S. *et al.* Standards and guidelines for the interpretation of sequence  
726 variants: a joint consensus recommendation of the American College of  
727 Medical Genetics and Genomics and the Association for Molecular Pathology.  
728 *Genet Med* **17**, 405-424 (2015). <https://doi.org/10.1038/gim.2015.30>
- 729 27 Buchert, R. *et al.* SPATA5 mutations cause a distinct autosomal recessive  
730 phenotype of intellectual disability, hypotonia and hearing loss. *Orphanet*  
731 *Journal of Rare Diseases* **11**, 1-7 (2016).
- 732 28 Jaganathan, K. *et al.* Predicting Splicing from Primary Sequence with Deep  
733 Learning. *Cell* **176**, 535-548 e524 (2019).  
734 <https://doi.org/10.1016/j.cell.2018.12.015>
- 735 29 Yun, Y. *et al.* Expanding Genotype-Phenotype Correlation of CLCNKA and  
736 CLCNKB Variants Linked to Hearing Loss. *Int J Mol Sci* **24** (2023).  
737 <https://doi.org/10.3390/ijms242317077>
- 738 30 Nam, D. W. *et al.* Allelic hierarchy for USH2A influences auditory and visual  
739 phenotypes in South Korean patients. *Sci Rep* **13**, 20239 (2023).  
740 <https://doi.org/10.1038/s41598-023-47166-w>
- 741 31 Delmaghani, S. & El-Amraoui, A. Inner ear gene therapies take off: current  
742 promises and future challenges. *Journal of clinical medicine* **9**, 2309 (2020).
- 743 32 van der Valk, W. H. *et al.* A single-cell level comparison of human inner ear  
744 organoids with the human cochlea and vestibular organs. *Cell Rep* **42**,  
745 112623 (2023). <https://doi.org/10.1016/j.celrep.2023.112623>
- 746 33 Investigators, G. P. P. *et al.* 100,000 Genomes Pilot on Rare-Disease  
747 Diagnosis in Health Care - Preliminary Report. *N Engl J Med* **385**, 1868-1880  
748 (2021). <https://doi.org/10.1056/NEJMoa2035790>
- 749 34 Turro, E. *et al.* Whole-genome sequencing of patients with rare diseases in a

- 750 national health system. *Nature* **583**, 96-102 (2020).  
751 <https://doi.org/10.1038/s41586-020-2434-2>
- 752 35 Lunke, S. *et al.* Integrated multi-omics for rapid rare disease diagnosis on a  
753 national scale. *Nat Med* **29**, 1681-1691 (2023).  
754 <https://doi.org/10.1038/s41591-023-02401-9>
- 755 36 Yang, Y. *et al.* Reevaluating the splice-altering variant in TECTA as a cause of  
756 nonsyndromic hearing loss DFNA8/12 by functional analysis of RNA. *Hum*  
757 *Mol Genet* (2024). <https://doi.org/10.1093/hmg/ddae071>
- 758 37 Jiang, L., Wang, D., He, Y. & Shu, Y. Advances in gene therapy hold promise  
759 for treating hereditary hearing loss. *Molecular Therapy* (2023).
- 760 38 Petit, C., Bonnet, C. & Safieddine, S. Deafness: from genetic architecture to  
761 gene therapy. *Nature Reviews Genetics*, 1-22 (2023).
- 762 39 Yun, Y. & Lee, S. Y. Updates on Genetic Hearing Loss: From Diagnosis to  
763 Targeted Therapies. *J Audiol Otol* **28**, 88-92 (2024).  
764 <https://doi.org/10.7874/jao.2024.00157>
- 765 40 Lv, J. *et al.* AAV1-hOTOF gene therapy for autosomal recessive deafness 9: a  
766 single-arm trial. *Lancet* **403**, 2317-2325 (2024). [https://doi.org/10.1016/S0140-](https://doi.org/10.1016/S0140-6736(23)02874-X)  
767 [6736\(23\)02874-X](https://doi.org/10.1016/S0140-6736(23)02874-X)
- 768 41 Wang, H. *et al.* Bilateral gene therapy in children with autosomal recessive  
769 deafness 9: single-arm trial results. *Nat Med* **30**, 1898-1904 (2024).  
770 <https://doi.org/10.1038/s41591-024-03023-5>
- 771 42 Kim, J. *et al.* A framework for individualized splice-switching oligonucleotide  
772 therapy. *Nature* **619**, 828-836 (2023). [https://doi.org/10.1038/s41586-023-](https://doi.org/10.1038/s41586-023-06277-0)  
773 [06277-0](https://doi.org/10.1038/s41586-023-06277-0)
- 774 43 Kweon, J. *et al.* Targeted genomic translocations and inversions generated  
775 using a paired prime editing strategy. *Molecular Therapy* **31**, 249-259 (2023).
- 776 44 Chen, P. J. & Liu, D. R. Prime editing for precise and highly versatile genome  
777 manipulation. *Nature Reviews Genetics* **24**, 161-177 (2023).
- 778 45 Yi, H. *et al.* CRISPR-based editing strategies to rectify EYA1 complex  
779 genomic rearrangement linked to haploinsufficiency. *Mol Ther Nucleic Acids*  
780 **35**, 102199 (2024). <https://doi.org/10.1016/j.omtn.2024.102199>
- 781 46 Liao, E. N., Taketa, E., Mohamad, N. I. & Chan, D. K. Outcomes of Gene  
782 Panel Testing for Sensorineural Hearing Loss in a Diverse Patient Cohort.



- 783 *JAMA Network Open* **5**, e2233441-e2233441 (2022).
- 784 47 Lee, S.-Y. *et al.* Natural course of residual hearing with reference to GJB2 and  
785 SLC26A4 genotypes: Clinical implications for hearing rehabilitation. *Ear and*  
786 *Hearing* **42**, 644-653 (2021).
- 787 48 Lee, S.-Y. *et al.* No auditory experience, no tinnitus: lessons from subjects  
788 with congenital-and acquired single-sided deafness. *Hearing research* **354**, 9-  
789 15 (2017).
- 790 49 Lin, P.-H. *et al.* Etiologic and audiologic characteristics of patients with  
791 pediatric-onset unilateral and asymmetric sensorineural hearing loss. *JAMA*  
792 *otolaryngology–head & neck surgery* **143**, 912-919 (2017).
- 793 50 Han, K.-H. *et al.* Establishment of a flexible real-time polymerase chain  
794 reaction-based platform for detecting prevalent deafness mutations  
795 associated with variable degree of sensorineural hearing loss in Koreans.  
796 *PloS one* **11**, e0161756 (2016).
- 797 51 Lee, S.-Y. *et al.* Flexible real-time polymerase chain reaction-based platforms  
798 for detecting deafness mutations in Koreans: A proposed guideline for the  
799 etiologic diagnosis of auditory neuropathy spectrum disorder. *Diagnostics* **10**,  
800 672 (2020).
- 801 52 Kim, S. Y. *et al.* Prevalence of p. V37I variant of GJB2 in mild or moderate  
802 hearing loss in a pediatric population and the interpretation of its pathogenicity.  
803 *PloS one* **8**, e61592 (2013).
- 804 53 Van der Auwera, G. A. *et al.* From FastQ data to high confidence variant calls:  
805 the Genome Analysis Toolkit best practices pipeline. *Curr Protoc*  
806 *Bioinformatics* **43**, 11 10 11-11 10 33 (2013).  
807 <https://doi.org/10.1002/0471250953.bi1110s43>
- 808 54 Wang, K., Li, M. & Hakonarson, H. ANNOVAR: functional annotation of  
809 genetic variants from high-throughput sequencing data. *Nucleic Acids Res* **38**,  
810 e164 (2010). <https://doi.org/10.1093/nar/gkq603>
- 811 55 Jung, K. S. *et al.* KRGDB: the large-scale variant database of 1722 Koreans  
812 based on whole genome sequencing. *Database (Oxford)* **2020** (2020).  
813 <https://doi.org/10.1093/database/baaa030>
- 814 56 Stenson, P. D. *et al.* The Human Gene Mutation Database: towards a  
815 comprehensive repository of inherited mutation data for medical research,

816 genetic diagnosis and next-generation sequencing studies. *Hum Genet* **136**,  
817 665-677 (2017). <https://doi.org/10.1007/s00439-017-1779-6>

818 57 Landrum, M. J. *et al.* ClinVar: improving access to variant interpretations and  
819 supporting evidence. *Nucleic Acids Res* **46**, D1062-D1067 (2018).  
820 <https://doi.org/10.1093/nar/gkx1153>

821 58 Li, Q. & Wang, K. InterVar: Clinical Interpretation of Genetic Variants by the  
822 2015 ACMG-AMP Guidelines. *Am J Hum Genet* **100**, 267-280 (2017).  
823 <https://doi.org/10.1016/j.ajhg.2017.01.004>

824 59 Oza, A. M. *et al.* Expert specification of the ACMG/AMP variant interpretation  
825 guidelines for genetic hearing loss. *Hum Mutat* **39**, 1593-1613 (2018).  
826 <https://doi.org/10.1002/humu.23630>

827 60 Tang, S. & Huang, T. Characterization of mitochondrial DNA heteroplasmy  
828 using a parallel sequencing system. *Biotechniques* **48**, 287-296 (2010).  
829 <https://doi.org/10.2144/000113389>

830 61 Faust, G. G. & Hall, I. M. SAMBLASTER: fast duplicate marking and structural  
831 variant read extraction. *Bioinformatics* **30**, 2503-2505 (2014).  
832 <https://doi.org/10.1093/bioinformatics/btu314>

833 62 Kim, S. *et al.* Strelka2: fast and accurate calling of germline and somatic  
834 variants. *Nat Methods* **15**, 591-594 (2018). [https://doi.org/10.1038/s41592-](https://doi.org/10.1038/s41592-018-0051-x)  
835 [018-0051-x](https://doi.org/10.1038/s41592-018-0051-x)

836

837

838 **Acknowledgements:** This research was supported and funded by SNUH Kun-hee  
839 Lee Child Cancer & Rare Disease Project, Republic of Korea (grant number: FP-  
840 2022-00001-004 to Sang-Yeon Lee), SNU Medicine grant (basic and clinic  
841 cooperation research grant number: 800-20230428 to Sang-Yeon Lee), and National  
842 Research Foundation of Korea (NRF) and funded by the Ministry of Education (grant  
843 number: 2022R1C1C1003147 to Sang-Yeon Lee). This research was supported by a  
844 grant from the Korea Health Technology R&D Project through the Korea Health  
845 Industry Development Institute (KHIDI), funded by the Ministry of Health & Welfare,  
846 Republic of Korea (grant number: HI22C182600 to June-Young Koh).

847

848 **Contributions:** Concept and design: S.-Y.L., J.-H.C. Acquisition, analysis, or  
849 interpretation of data: S.-Y.L., S.L., S.P., J.-Y.K., S.H.J., Y.J., W.H.C., J.H.C. Drafting  
850 of the manuscript: S.-Y.L., S.L., S.P., J.-Y.K. Critical review of the manuscript for  
851 important intellectual content: S.-Y.L., S.L., S.P., J.-Y.K. Statistical analysis: S.-Y.L.,  
852 S.P., J.-Y.K. Obtained funding: S.-Y.L., J.-Y.K. Administrative, technical, or material  
853 support: H.Y., S.L., M.-W.S., M.K.P., J.-J.S., B.Y.C., J.H.L. Supervision: J.-H.C. Y.S.J.

854

855 **Competing interests:**

856 Young Seok Ju is the founder of Inocras Inc., a genome analysis and interpretation  
857 company. Young Seok Ju, June-Young Koh, Seongyeol Park, and Sangmoon Lee  
858 hold stocks or stock options in Inocras Inc.

859 **Figure legends**

860 **Figure 1. Study design and diagnostic pipeline.** Flow diagram illustrating a  
861 prospective, step-by-step genetic approach of 394 unrelated SNHL families and 750  
862 individuals including probands in our cohort study. The diagnostic pipeline included  
863 Step 1 (real-time PCR screening kit and direct *GJB2* sequencing), Step 2-1 (targeted  
864 panel sequencing or whole-exome sequencing), Step 2-2 (MLPA and/or mtDNA  
865 panel sequencing), Step 3-1 (whole-genome sequencing), and Step 3-2 (deep  
866 intronic variant analysis). SNHL, sensorineural hearing loss; BOR/BO syndrome,  
867 branchio-oto-renal/branchio-otic syndrome; MLPA, multiplex ligation-dependent  
868 probe amplification; mtDNA, mitochondrial DNA; CI, confidence interval.

869

870 **Figure 2. Stepwise genetic diagnosis outcomes in SNHL patients.**

871 (a) Diagnostic yield of each genetic test for the whole SNHL cohort. Bar graph  
872 showing the cumulative diagnostic rate according to genetic diagnosis steps. (b-c)  
873 Diagnostic yield based on SNHL phenotypes and comparative analysis within the  
874 whole SNHL cohort ( $n = 394$  families; b) and within the WGS cases ( $n = 120$  families;  
875 c). Statistical significance for hearing loss onset and syndromic features was  
876 determined using one-way ANOVA with Bonferroni's multiple comparisons tests and  
877 the t-test, respectively. Significance levels are indicated as  $*P < 0.05$ . (d) Pearson's  
878 correlation coefficient values for causative variants between the allele frequencies  
879 (AFs) in our cohort and those from other populations. The AFs in our cohort showed  
880 the highest correlation with the Korean database, KOVA, followed by the East Asian  
881 population within gnomAD. (e) Dot plots shows the AF correlation between our  
882 cohort and KOVA. There are three variants (pink dots) showing higher AFs in KOVA,  
883 suggesting their phenotypic variability such as low penetrance or late onset

884 associated with these variants. A fitted line of linear regression model (blue line) and  
885 95% confidence intervals (grey area) are displayed. (f) Distribution of variant  
886 subtypes identified at each diagnostic step. WGS, whole-genome sequencing; MLPA,  
887 multiplex ligation-dependent probe amplification; mtDNA, mitochondrial DNA; SNHL,  
888 sensorineural hearing loss; SNV, single nucleotide variant; indel, insertion/deletion.  
889

### 890 **Figure 3. Genomic landscape of the SNHL cohort.**

891 (a) Bar plot showing the frequencies and inheritance patterns of 63 SNHL-associated  
892 genes from 219 genetically diagnosed families. Pie chart showing the percentages of  
893 inheritance patterns. (b) Bar plot showing the mutational landscape of the total 352  
894 likely pathogenic or pathogenic variants among the 63 SNHL genes. Pie chart  
895 showing the percentages of variant types. (c) Proportion of novel variants among  
896 identified causal variants. (d) Structural variants (SVs) were more common among  
897 novel variants compared to previously reported variants. (e) Novel variants were  
898 frequently identified through WGS (Step 3-1) and SpliceAI-based deep intronic  
899 variants analysis (Step 3-2). (f, g) Schematic illustrations showing the location of  
900 each identified pathogenic variant within *SPATA5* and *CLCNKA-CLCNKB* in the  
901 probands (top, respectively). The genomic regions corresponding to each variant are  
902 visualized using the integrative genomics viewer (bottom) for each figure. SNHL,  
903 sensorineural hearing loss; SNV, single nucleotide variant; indel, insertion/deletion;  
904 SV, structural variation.

905

### 906 **Figure 4. Analysis of carrier and deep intronic variants in undiagnosed SNHL** 907 **patients.**

908 (a) Schematic diagram illustrating carrier status identification and screening for

909 pathogenic deep intronic variants. (b) Bar plot showing the proportion of genetic  
910 carriers for SNHL-related genes across each cohort. (c) Cumulative distribution plot  
911 showing the MAF of candidate pathogenic variants across cohorts. (d) Schematic  
912 illustration of the location of each identified pathogenic variant within *USH2A* in each  
913 patient. (e) Schematic diagram of the pSPL3 vector with *USH2A* c.7120+1475A>G  
914 (left), c.14134-3169A>G (middle), and c.4628-26037A>G (right). (f) Electrophoresis  
915 gel image showing the bands corresponding to the pSPL3 empty vector (263 bp),  
916 each variant, and wild-type. (g) Schematic representation of the splice products with  
917 the wild-type splicing profile, and the splice variant profiles for each mutant type.  
918 SNHL, sensory neural hearing loss; WGS, whole-genome sequencing; HC, healthy  
919 control; AR, autosomal recessive; MOI, mode of inheritance; P, pathogenic; LP, likely  
920 pathogenic; MAF, minor allele frequency; SV, structural variation; TE, transposable  
921 element; SD, splicing donor; SA, splicing acceptor; PE, pseudoexon.

922

923 **Figure 5. Functional classification and clinical relevance of SNHL-related**  
924 **genes.** (a) Schematic illustration of seven functional categories according to the  
925 molecular mechanisms related to inner-ear function. (b) Heatmap showing the  
926 correlation of gene expression patterns across different gene categories. (c)  
927 Comparison of specific phenotypic presentations by seven inner ear functional  
928 categories. The x-axis represents classifications based on inner ear molecular  
929 functions, and y-axis indicates the proportion of clinical phenotypes among affected  
930 probands. (d) Bar graphs showing post-hoc analysis using the false discovery rate.  
931 Red represents the proportion of affected probands within the total number of  
932 probands assigned to specific inner ear molecular functional groups.\* denotes  
933 statistical significance ( $P < 0.05$ ).

# Main figure 1

medRxiv preprint doi: <https://doi.org/10.1101/2024.12.08.24318682>; this version posted December 10, 2024. The copyright holder for this preprint (which was not certified by peer review) is the author/funder, who has granted medRxiv a license to display the preprint in perpetuity.

It is made available under a [CC-BY-NC-ND 4.0 International license](#).

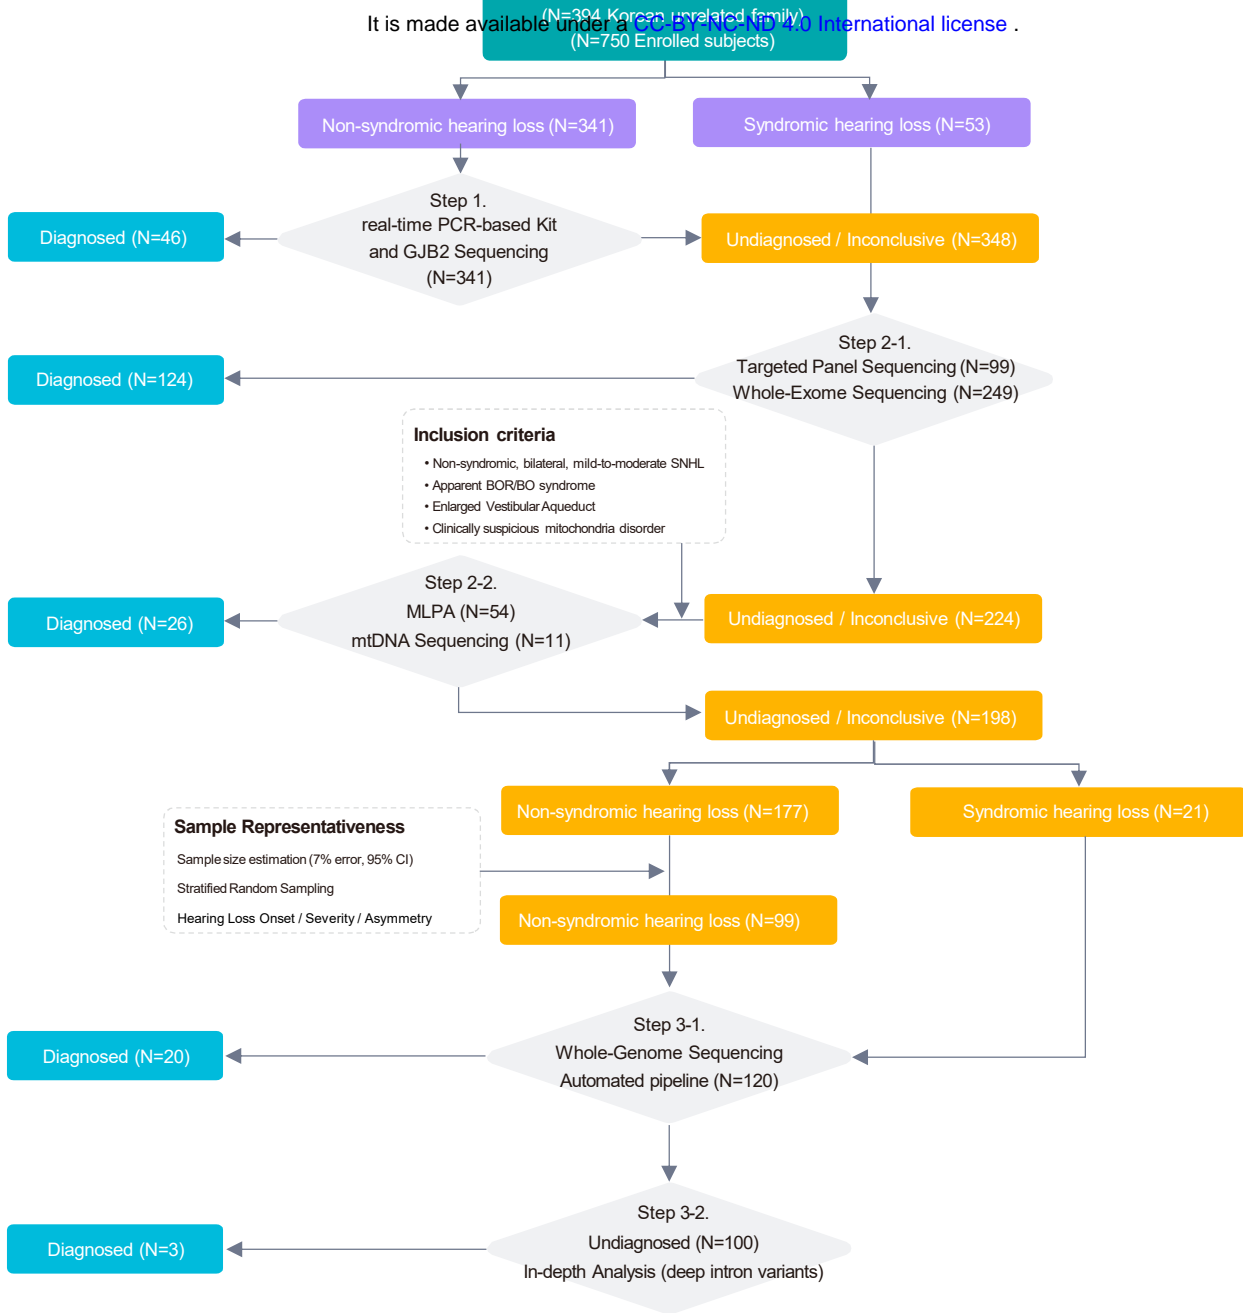

# Main figure 2

medRxiv preprint doi: <https://doi.org/10.1101/2024.12.08.24318682>; this version posted December 10, 2024. The copyright holder for this preprint (which was not certified by peer review) is the author/funder, who has granted medRxiv a license to display the preprint in perpetuity. It is made available under a [CC-BY-NC-ND 4.0 International license](#).

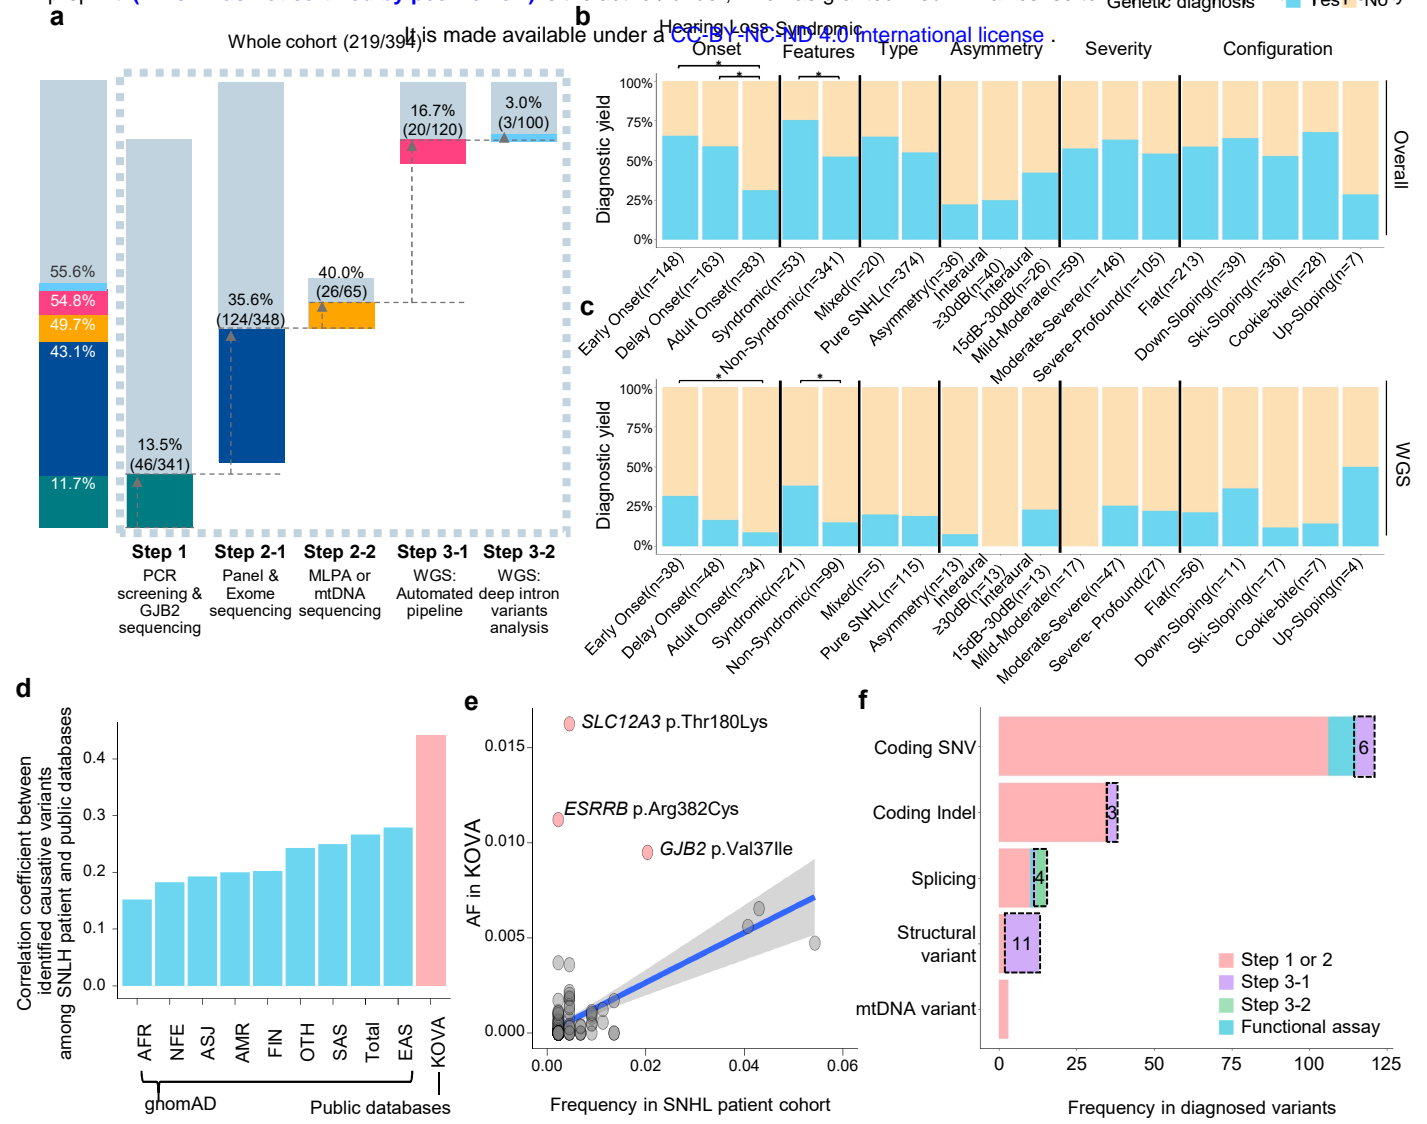



# Main figure 3

medRxiv preprint doi: <https://doi.org/10.1101/2024.12.08.24318682>; this version posted December 10, 2024. The copyright holder for this preprint (which was not certified by peer review) is the author/funder, who has granted medRxiv a license to display the preprint in perpetuity.

It is made available under a [CC-BY-NC-ND 4.0 International license](https://creativecommons.org/licenses/by-nc-nd/4.0/)

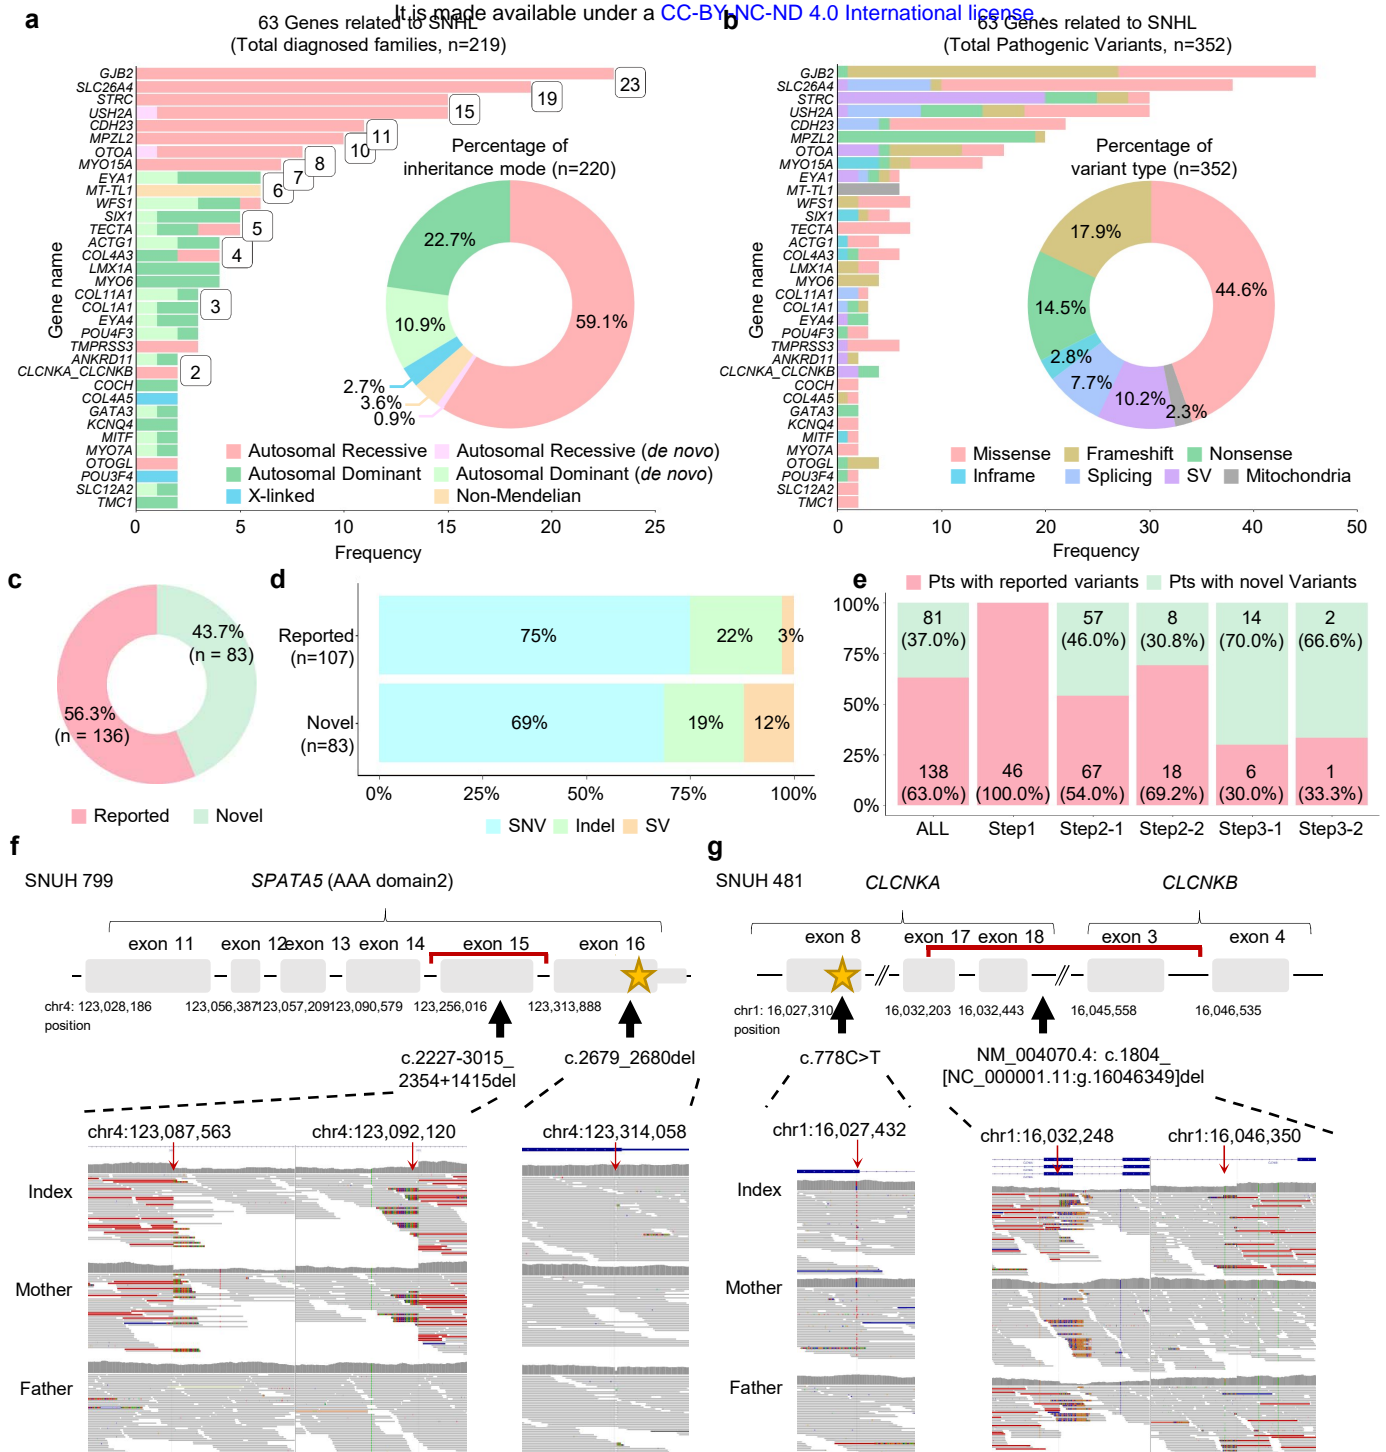

# Main figure 4

medRxiv preprint doi: <https://doi.org/10.1101/2024.12.08.24318682>; this version posted December 10, 2024. The copyright holder for this preprint (which was not certified by peer review) is the author/funder, who has granted medRxiv a license to display the preprint in perpetuity.

It is made available under a [CC-BY-NC-ND 4.0 International license](https://creativecommons.org/licenses/by-nc-nd/4.0/).

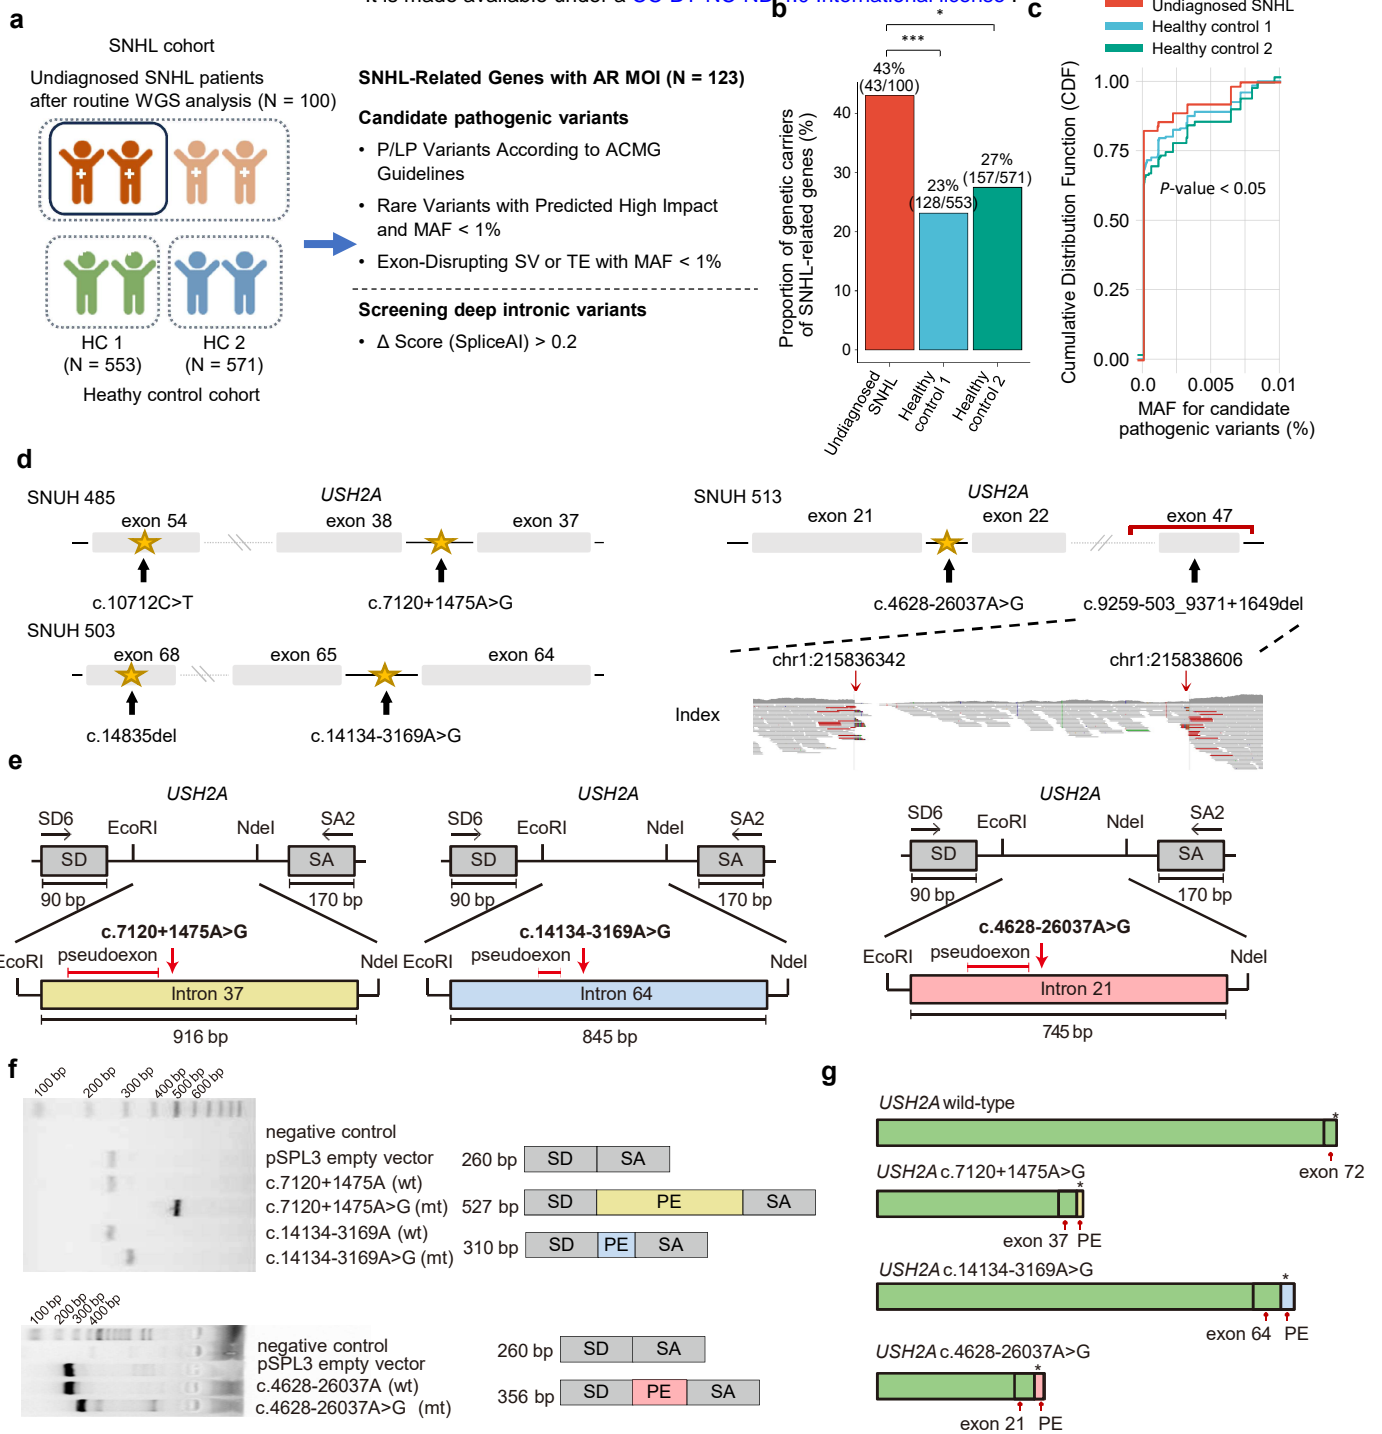

# Main figure 5

medRxiv preprint doi: <https://doi.org/10.1101/2024.12.08.24318682>; this version posted December 10, 2024. The copyright holder for this preprint (which was not certified by peer review) is the author/funder, who has granted medRxiv a license to display the preprint in perpetuity.

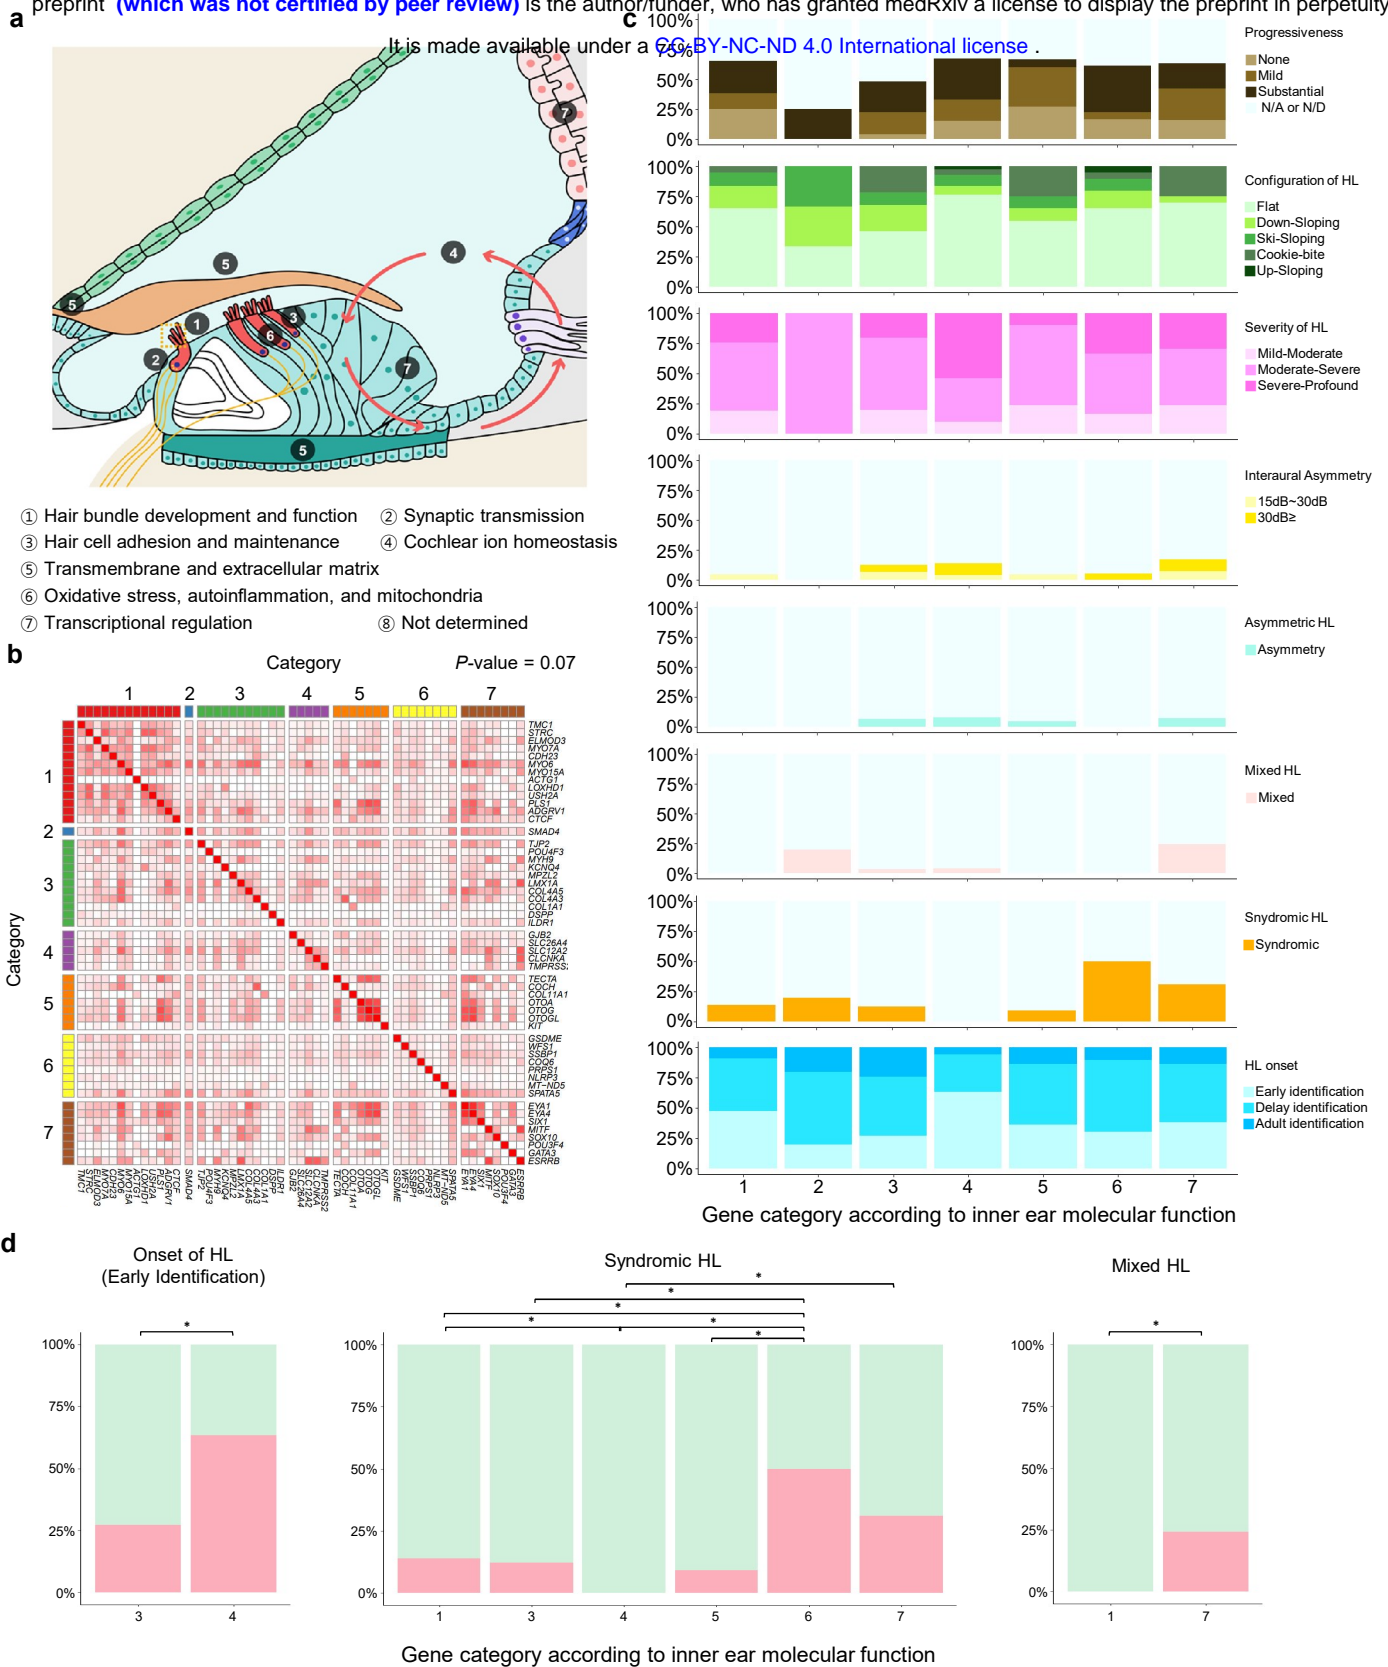

Source: https://medrxiv.org/content/10.1101/2024.12.08.24318682v1.full.pdf
